1 **Sortase-assembled pili promote extracellular electron transfer and iron acquisition in**  
2 ***Enterococcus faecalis* biofilm**

3 Ling Ning Lam<sup>1,2,7</sup>, Jun Jie Wong<sup>1,3</sup>, Artur Matysik<sup>1</sup>, Jason J. Paxman<sup>4</sup>, Kelvin Kian Long  
4 Chong<sup>1,5</sup>, Pui Man Low<sup>1</sup>, Zhi Sheng Chua<sup>1</sup>, Begoña Heras<sup>4</sup>, Enrico Marsili<sup>1,6</sup> and Kimberly  
5 A. Kline<sup>1,2,\*</sup>

6 <sup>1</sup>Singapore Centre for Environmental Life Science Engineering, Nanyang Technological  
7 University, 60 Nanyang Drive, Singapore 637551

8 <sup>2</sup>School of Biological Sciences, Nanyang Technological University, 60 Nanyang Drive,  
9 Singapore 637551

10 <sup>3</sup>Interdisciplinary Graduate School, Nanyang Technological University, Singapore 639798

11 <sup>4</sup>Department of Biochemistry and Genetics, La Trobe Institute for Molecular Science, La  
12 Trobe University, Science Drive, Bundoora VIC 3083, Melbourne, Australia

13 <sup>5</sup>Nanyang Technological University Institute for Health Technologies, Interdisciplinary  
14 Graduate School, Nanyang Technological University, 50 Nanyang Drive, Singapore 637553

15 <sup>6</sup>Department of Chemical and Materials Engineering, Nazarbayev University, 53 Kabanbay  
16 Batyr Avenue, Nur-Sultan 010000, Kazakhstan

17 <sup>7</sup>Department of Oral Biology, College of Dentistry, University of Florida, 1395 Center Drive,  
18 Gainesville, FL 32610, United States

19 \*Correspondence: [kkline@ntu.edu.sg](mailto:kkline@ntu.edu.sg)

20

21 **Keywords:** *Enterococcus faecalis* biofilm, iron acquisition, endocarditis and biofilm

22 associated pili, extracellular electron transfer, virulence

23 **Classification:** Biological Sciences, Microbiology

## 24 **Abstract**

25 *Enterococcus faecalis* is an opportunistic human pathogen and the cause of biofilm-  
26 associated infections of the heart, catheterized urinary tract, wounds, and the dysbiotic gut  
27 where it can expand to high numbers upon microbiome perturbations. The *E. faecalis* sortase-  
28 assembled endocarditis and biofilm associated pilus (Ebp) is involved in adhesion and  
29 biofilm formation *in vitro* and *in vivo*. Extracellular electron transfer (EET) also promotes *E.*  
30 *faecalis* biofilm formation in iron-rich environments, however neither the mechanism  
31 underlying EET nor its role in virulence was previously known. Here we show that iron  
32 associated with Ebp serve as a terminal electron acceptor for EET, leading to extracellular  
33 iron reduction and intracellular iron accumulation. We found that a MIDAS motif within the  
34 EbpA tip adhesin is required for interaction with iron, EET, and FeoB-mediated iron uptake.  
35 We demonstrate that MenB and Ndh3, essential components of the aerobic respiratory chain  
36 and a specialized flavin-mediated electron transport chain, respectively, are required for iron-  
37 mediated EET. In addition, using a mouse gastrointestinal (GI) colonization model, we show  
38 that EET is essential for colonization of the GI tract, and Ebp is essential for augmented *E.*  
39 *faecalis* GI colonization when dietary iron is in excess. Taken together, our findings show  
40 that pilus mediated capture of iron within biofilms enables EET-mediated iron acquisition in  
41 *E. faecalis*, and that these processes plays an important role in *E. faecalis* expansion in the GI  
42 tract.

43

## 44 **Significance**

45 Understanding enterococcal biofilm development is the first step towards improved  
46 therapeutics for the often antimicrobial resistant infections caused by these bacteria. Here we  
47 report a role for *Enterococcus faecalis* endocarditis and biofilm associated pili (Ebp) in  
48 mediating iron-dependent biofilm growth and contributing to extracellular electron transfer

49 (EET) which in turn promotes iron acquisition. Furthermore, we characterize the mechanisms  
50 underlying electron transfer in the *E. faecalis* biofilm. Our findings support a model in which  
51 *E. faecalis* use EET to drive the reduction of pilus-associated ferric iron, leading to iron  
52 acquisition in *E. faecalis* biofilm, and contributing to enterococcal virulence in the GI tract.

53

## 54 **Introduction**

55 *Enterococcus faecalis* is an important human opportunistic pathogen that causes a variety of  
56 diseases including endocarditis, urinary tract infections (UTI), bacteremia, wound infection,  
57 and medical device-associated infections <sup>1</sup>. Many of these infections are polymicrobial and  
58 biofilm-associated, rendering them more tolerant to antimicrobial and immune clearance, and  
59 contributing to their persistent nature <sup>1</sup>. Therefore, a detailed understanding of enterococcal  
60 biofilm development is a critical step towards advancing new therapeutics for treatment of  
61 these often antimicrobial resistant infections <sup>1,2</sup>.

62

63 One important factor contributing to *E. faecalis* biofilm formation and virulence is the  
64 sortase-assembled endocarditis and biofilm associated pilus (Ebp) <sup>3-7</sup>. The importance of Ebp  
65 to *E. faecalis* is supported by the presence of its coding sequence in the core *E. faecalis*  
66 genome <sup>5,8</sup>. The Ebp fiber is primarily composed of the major pilin subunit EbpC, along with  
67 two dispensable minor pilin subunits EbpB and EbpA <sup>5</sup>, and these pilin subunits are  
68 covalently assembled by Sortase C on the cell membrane, prior to attachment to the cell wall  
69 by Sortase A <sup>6,9</sup>. EbpA is the tip adhesin of the pilus, and its N terminus encompasses a metal  
70 ion-dependent adhesion site (MIDAS) motif. In eukaryotes, the MIDAS motif is important  
71 for ligand binding <sup>10</sup> and coordinates divalent cations, most often Mg<sup>2+</sup> <sup>11,12</sup>, for cell adhesion  
72 and interaction with extracellular matrix (ECM) proteins <sup>12</sup>. The MIDAS motif within the N-  
73 terminal domain of *E. faecalis* EbpA contributes to *in vitro* biofilm formation, adherence to

74 fibrinogen, and bladder colonization in a mouse catheter-associated urinary tract infection  
75 (CAUTI) model<sup>13-15</sup>. Sortase-assembled pili are conserved in many Gram-positive bacteria,  
76 where they often contribute to adhesion, biofilm formation, modulation of host immune  
77 response, and virulence<sup>16,17</sup>. The adhesive tips of these pilins (PilA of *Streptococcus*  
78 *agalactiae*<sup>18</sup>, RrgA of *Streptococcus pneumoniae*<sup>19</sup>, and AP-1 of *Streptococcus pyogenes*<sup>20</sup>)  
79 include a conserved von Willebrand factor A (vWFA) domain containing a MIDAS motif,  
80 which are essential for adhesion. However, the specificity and affinity for metal binding to  
81 the MIDAS motif in bacteria, including *E. faecalis*, has not been characterized.

82

83 Previously, we demonstrated that *E. faecalis* is electrogenic, and that iron promotes both  
84 extracellular electron transfer (EET) and biofilm growth in *E. faecalis*<sup>21</sup>. Several mechanisms  
85 for EET have been described in both Gram-positive and Gram-negative bacteria<sup>22,23</sup>. In some  
86 bacteria, microbial nanowires, composed of extracellular filamentous protein fibers and/or of  
87 cytochrome-associated fibers, have been proposed to aid EET by directly connecting the  
88 bacterial cell surface to extracellular metal oxides, or alternatively, by interacting with  
89 extracellular soluble redox mediators<sup>23,24</sup>. Biochemical and structural analysis have recently  
90 demonstrated that the conductive filaments of *Geobacter sulfurreducens* consist of  
91 polymerized chains of the hexaheme cytochrome OmcS<sup>25</sup>. Gram positive bacteria have  
92 evolved a highly conserved mechanism for EET, described in *L. monocytogenes*, which  
93 involves a specialized respiratory complex that channels electrons through discrete  
94 membrane-localized quinone pools to flavin intermediates, for subsequent delivery to  
95 terminal extracellular electron acceptors<sup>26</sup>. In *E. faecalis*, electroactivity requires the ability  
96 to synthesize L-lactate dehydrogenase (LDH)<sup>21</sup> and demethylmenaquinone (DMK)<sup>27</sup>,  
97 important for catalyzing redox reactions and electron transfer during respiration, respectively  
98<sup>28</sup>.

99

100 In this study, we sought to understand the mechanism and physiological role of EET in *E.*  
101 *faecalis*. We show that EET in *E. faecalis* makes use of both DMK and the conserved flavin  
102 EET pathway described in *L. monocytogenes* for electron delivery to extracellular pilus-  
103 associated iron deposits. Iron induces the expression of Ebp pili, increasing the interaction  
104 sites for iron, which include the MIDAS motif of the EbpA tip adhesin, which is required for  
105 pilus association with iron as well as for iron-augmented biofilm formation. In addition, we  
106 show that EET drives the reduction of iron leading to FeoB-mediated uptake of iron into the  
107 *E. faecalis* biofilm cells. Finally, we demonstrate that a high iron diet promotes *E. faecalis*  
108 mouse gastrointestinal (GI) colonization in an *ebp*-dependent manner, and EET mutants are  
109 attenuated in the GI tract. Together, these findings suggest a model in which iron promotes  
110 pilus-mediated biofilm formation. We propose that the association of iron with sortase-  
111 assembled Ebp sequesters iron close to the cell surface within biofilms where it can serve as  
112 an extracellular electron acceptor for EET, resulting in the generation of ferrous iron for  
113 subsequent uptake into the cell. This new paradigm for iron acquisition in which pili and  
114 aggregates of pilated cells serve as iron sinks to promote biofilm formation and intracellular  
115 iron accumulation, significantly advances our mechanistic understanding of both biofilm  
116 formation and the pathogenesis of *E. faecalis*.

117

## 118 **Results**

### 119 **Iron-augmented *E. faecalis* biofilm formation requires pilus expression**

120 We previously demonstrated that *E. faecalis* biofilm growth in media supplemented with iron  
121 resulted in two-fold more biomass<sup>21</sup>. To test the hypothesis that Ebp contributes to iron-  
122 augmented biofilm, we performed biofilm assays in growth media supplemented with 2 mM  
123 ferric chloride (FeCl<sub>3</sub>), and quantified total adherent biofilm biomass. In iron-supplemented

124 media, deletion mutants of the entire Ebp pilus ( $\Delta ebpABC$ ), pilus tip ( $\Delta ebpA$ ) and pilus fiber  
125 ( $\Delta ebpC$ ) displayed more than a 50% reduction in biofilm growth compared to the wild type  
126 control (**Figure 1a**) and mutant biofilm levels in iron-supplemented media were most similar  
127 to wild type biofilm in the absence of iron augmentation (**Figure S1a**). Biofilm formation by  
128 the pilus null  $\Delta ebpABC$  mutant was restored to wild type levels upon genetic  
129 complementation with the full locus (*pebpABCsrtC*). A  $\Delta ebpB$  deletion mutant also displayed  
130 significantly reduced biofilm growth as compared to the wild type control in iron-  
131 supplemented media; however, it was not as strongly attenuated compared to the other pilus  
132 mutants (**Figure 1a**). These findings are consistent with previous reports in which deletion of  
133 *ebpA* and *ebpABC* resulted in significantly reduced biofilm formation in normal media  
134 (**Figure S1a, S2b**)<sup>6,29</sup>. These results indicate that the fully assembled Ebp pilus fiber  
135 contributes substantially to iron-augmented biofilm formation with a key role for the EbpA  
136 pilus tip (**Figure 1a, S1b**). We next tested the contribution of the MIDAS motif within EbpA  
137 to iron-mediated biofilm growth. Using a MIDAS mutant (*ebpA<sup>AWAGA</sup>*), in which the native  
138 motif (Asp<sup>275</sup>-Trp-Ser<sup>277</sup>-Gly-Ser<sup>279</sup>) is mutated to (Ala<sup>275</sup>-Trp-Ala<sup>277</sup>-Gly-Ala<sup>279</sup>)<sup>13</sup>, we  
139 observed that it was as attenuated as the *ebpABC* null mutant for biofilm formation in iron-  
140 supplemented media (**Figure 1a, S1a**). Collectively, these data demonstrate that both the  
141 MIDAS motif of the EbpA tip adhesin, as well as an intact EbpC pilus fiber, are essential for  
142 iron-mediated biofilm growth.

143

#### 144 **Iron induces pilus expression and drives aggregation of pilus-expressing cells in *E.*** 145 ***faecalis* biofilm**

146 Iron-augmented *E. faecalis* biofilms have an altered 3-D structure<sup>21</sup>. To determine whether  
147 pilus expression contributes to the biofilm ultrastructure, we used immunofluorescence  
148 microscopy to visualize pilus-expressing cells within biofilms. Augmented biofilm biomass  
149 after growth in iron-supplemented media, as previously reported, was not apparent for the

150  $\Delta ebpABC$  or the  $ebpA^{AWAGA}$  mutants (**Figure 1b**)<sup>21</sup>. In addition, pilus-expressing cells tended  
151 to aggregate in areas of higher cell density in biofilms grown in iron-supplemented media  
152 (**Figure 1c**). The abundance of piliated cell aggregates within the biofilm suggested that  
153 pilus expression may be induced in the presence of iron. We therefore quantified the number  
154 of biofilm cells expressing pili and observed a significantly larger pilus-expressing  
155 population in biofilms grown in ferric iron-supplemented media, but not in the presence of  
156 alternative iron sources or with other cationic metals (**Figure 1d**). By contrast, we observed  
157 no significant difference in planktonically grown pilus-expression in response to iron (**Figure**  
158 **1d**). Together these results show that ferric iron induces pilus expression, which in turn  
159 increases the biofilm structure and mass.

160

#### 161 **Iron colocalizes with pili on the cell surface and is dependent on the EbpA MIDAS motif**

162 While monitoring *E. faecalis* populations for piliation in iron-supplemented media, we  
163 observed dense deposits at the polar hemispheres of *E. faecalis* cells which co-localized with  
164 sites of EbpC deposition, suggesting that these dense deposits may be iron interacting with  
165 pili (**Figure 2a, Figure S2a-b**). We observed these dense deposits less frequently in the  
166  $ebpA^{AWAGA}$  mutant, even though this mutant strain expresses a similar proportion of piliated  
167 cells as WT (**Figure S2c**), and the dense deposits were completely absent in  $\Delta ebpABC$   
168 deletion mutant (**Figure 2a, Figure S2a-b**), suggesting that pili may be interacting with ferric  
169 iron via the MIDAS motif of EbpA.

170

171 To confirm the interaction between the EbpA MIDAS motif and iron, we extracted Ebp from  
172 *E. faecalis* wild type and  $ebpA^{AWAGA}$  biofilms grown in normal or iron supplemented media,  
173 and in parallel performed control extractions from  $\Delta ebpABC$  biofilms. Pili were isolated  
174 under native conditions and analyzed for iron content by inductive-coupled plasma mass

175 spectrometry (ICP-MS). Pilus extracts from wild type cells grown in the iron-supplemented  
176 media were associated with nearly three times more iron than wild type pilus extracts from  
177 biofilms grown in control media. Ebp association with iron was dependent on the EbpA  
178 MIDAS motif because pilus preps from *ebpA<sup>AWAGA</sup>* were similar to background iron levels in  
179 control  $\Delta$ *ebpABC* extracts (**Figure 2b**).

180

181 To better understand how the EbpA MIDAS motif could interact with ferric iron, we  
182 modelled the EbpA structure based upon the crystal structures of its Mg bound homologs, *S.*  
183 *agalactiae* PilA GBS104 (PDB: 3txa)<sup>30</sup> and *S. pneumoniae* RrgA (PDB: 2ww8)<sup>19</sup>. The  
184 overall EbpA structural model (N177-P620) showed the expected vWFA structural fold  
185 encompassing the MIDAS motif, consistent with other pili tip adhesins (**Figure 2c-d**). The  
186 model supports an interaction of the MIDAS motif and associated metal binding residues  
187 with ferric iron (**Figure 2e**). D275 would make a water mediated contact with the iron, the  
188 hydroxyl oxygen atoms of S277 and S279 and the carboxylate oxygen of D378 would make  
189 direct ionic bonds with iron and the classic 6-coordination of iron would be completed by 2  
190 water molecules. vWFA domains are known to undergo conformational changes from closed  
191 to open states, whereby iron bonding would be shifted from D378 to the nearby T350<sup>31</sup>. The  
192 metal binding residues were confirmed by an alignment of the EbpA, GBS104 and RrgA  
193 sequences, which despite low sequence identity, showed strict conservation of the MIDAS  
194 motif D275, S277, S279, T350 and D378 residues (**Figure S3**).

195

## 196 **Pili and the respiration-associated electron transport chain contribute to extracellular** 197 **electron transfer (EET)**

198 The association of Ebp with iron, coupled with the ability of *E. faecalis* to undergo iron-  
199 mediated EET<sup>21</sup>, suggested that pili themselves may be involved in the EET. To address this,



200 we measured the instantaneous current output by chronoamperometry and the cumulative  
201 charge production in biofilms grown in iron-supplemented media for 20 hours. We observed  
202 a reduction in cumulative charge production in both the  $\Delta ebpABC$  and  $ebpA^{AWAGA}$  MIDAS  
203 mutants when grown in 0.5 mM iron-supplemented media (**Figure 3a**). At higher iron  
204 concentrations, we did not observe significant differences in cumulative charge production  
205 over 20 hours (**Figure S4a**). The current output in the first few hours was similar for all  
206 strains (**Figure S4b**), but both pilin mutants exhibited an inability to sustain current output as  
207 compared to the wild-type control at later time points (**Figure S4a-b**). We therefore  
208 conclude that pili contribute to sustained EET, but that other mechanisms also contribute to  
209 *E. faecalis* EET in the absence of the pili.

210

211 To identify additional pathways, in addition to pili, that contribute to iron-mediated EET, we  
212 examined the *E. faecalis* homolog of the *L. monocytogenes* EET-specific NADH  
213 dehydrogenase (*ndh3*) for flavin-mediated EET<sup>26</sup>, as well as demethylmenaquinone (*menB*)  
214 for quinone-mediated EET<sup>28</sup>. We hypothesized that these electron transfer pathways may  
215 work together to promote EET. Indeed, we observed attenuated charge production in both  
216 *ndh3::Tn* and *menB::Tn* mutants<sup>32,33</sup> which was restored upon genetic complementation  
217 (**Figure 3b**), as well as in mutants predicted to work in concert with Ndh3 in the conserved  
218 EET pathway (**Figure S5**). Importantly, charge production was further reduced in the  
219 *ndh3::Tn*  $\Delta menB$  double mutant compared to either single mutant (**Figure 3b**), suggesting  
220 that DMK and Ndh3 work in non-redundant concert for efficient EET. Together, these  
221 findings demonstrate that both respiratory electron transport conduits and pili contribute to  
222 iron-mediated EET in *E. faecalis* biofilm.

223

224 **Genes encoding Ebp and the FeoB ferrous iron transporter are upregulated in *E.***

225 ***faecalis* biofilm**

226 To further understand how iron promotes *E. faecalis* biofilm, we performed RNA sequencing  
227 and found a total of 90 genes that were differentially regulated upon growth in iron-  
228 supplemented media (**Table S1**). As expected, the pilus genes *ebpA* (OG1RF\_RS04555) and  
229 *ebpB* (OG1RF\_RS04560) were induced 1.68-fold and 1.55-fold respectively, which we  
230 validated by qRT-PCR (**Figure S6**). Surprisingly, the only other iron-associated gene that  
231 showed both significant and differential expression was *feoB* (OG1RF\_RS01950) encoding a  
232 predicted ferrous iron transporter, which was up-regulated 1.38-fold (**Table S1**). Importantly,  
233 this suggested that *E. faecalis* biofilm grown in iron-supplemented media may be importing  
234 ferrous iron. This finding was consistent with our earlier study that showed *E. faecalis*  
235 intracellular iron concentrations were increased in biofilm cells grown in iron-supplemented  
236 media<sup>21</sup>. The simultaneous up-regulation of *ebpABC* and *feoB* as the sole iron-responsive  
237 transporter, along with our observations that Ebp co-purify with iron and are required for  
238 EET suggested that pilus-associated iron may be reduced during EET and subsequently taken  
239 up by the ferrous iron transporter FeoB.

240

241 **Extracellular ferric iron reduction replenishes ferrous iron pool for uptake by *E.***

242 ***faecalis* biofilm cells**

243 Since ferric iron reduction to ferrous iron requires EET and is facilitated by both Ebp pili and  
244 the respiration electron transport chain, we predicted that an inability to perform EET would  
245 coincide with attenuation in ferric iron reduction and subsequent diminished extracellular  
246 ferrous iron pools available for uptake via FeoB. We therefore performed ICP-MS to  
247 determine the intracellular iron content in pilus mutants and EET-associated mutants grown  
248 in iron-supplemented media. Since Ldh1 was previously shown to be important for *E.*

249 *faecalis* EET<sup>21</sup>, we predicted that the absence of *ldhI* may also lead to reduced intracellular  
250 iron accumulation. Consistent with these predictions, we observed significantly reduced  
251 intracellular iron for all pilus deletion mutants which was restored upon complementation, as  
252 well as reduced intracellular iron in the *ebpA*<sup>AWAGA</sup> MIDAS and the *ldhI* mutants.  
253 Furthermore, we observed significantly reduced intracellular iron in the *ndh3::Tn ΔmenB*  
254 mutant (**Figure 4a**). As predicted, the absence of *feoB* also led to reduced intracellular iron,  
255 in a genetically complementable manner (**Figure 4b**).

256  
257 If intracellular ferrous iron accumulation is a direct consequence of EET catalyzed ferric iron  
258 reduction, EET mutants should display reduced ability for ferric iron reduction. We tested  
259 this using a ferrozine assay, which reacts with ferrous iron to form a stable colored product.  
260 With a functional EET mechanism, we predict the presence of increased ferrous iron pools.  
261 As expected, we observed a significant decrease in ferrous iron pools in *ldh1*, *ndh3* and *menB*  
262 mutants (**Figure 4c**). Collectively, these data show that EET mutants are attenuated for ferric  
263 iron reduction and therefore intracellular iron accumulation.

264

## 265 **Pili and respiration-associated electron transfer systems contribute to colonization of** 266 **mouse GI tract**

267 To understand how iron-augmented biofilms and EET impact *E. faecalis* pathogenesis, we  
268 examined the role of dietary iron in an antibiotic-treated mouse gastrointestinal (GI)  
269 colonization model. We fed mice a diet containing normal amounts of iron (control; 200  
270 mg/kg ferric chloride) or excess iron (high iron; 2000 mg/kg ferric chloride), for 3 weeks  
271 prior to antibiotic exposure and subsequent ingestion of *E. faecalis* in the drinking water  
272 (**Figure 5a**). Twenty-four hours after inoculation, we recovered significantly more *E. faecalis*  
273 from the mouse colon in mice fed the high iron diet as compared to the control group and this

274 increase was dependent on Ebp expression (**Figure 5b**). Mice fed with high iron diet had  
275 increased levels of colon tissue-associated iron, which was not apparent in the cecum or small  
276 intestine (**Figure S7a**). Accordingly, no iron-dependent colonization differences were  
277 observed in those compartments (**Figure S7b**). These data suggest that dietary iron promotes  
278 *E. faecalis* Ebp-dependent colonization in the mouse colon. We next asked whether EET also  
279 provides a colonization advantage for *E. faecalis* in the GI tract. Indeed, both Ndh3 and  
280 MenB are required for GI colonization, independent of dietary manipulation (**Figure 5c**,  
281 **Figure S7c**). Together, these findings demonstrate that both the pili and EET are important  
282 for GI colonization.

283

## 284 **Discussion**

285 We previously showed that *E. faecalis* performs EET in the presence of extracellular iron,  
286 which was associated with ATP production, and that iron supplementation augments biofilm  
287 growth<sup>21</sup>. In this study, we sought to understand the mechanism underlying EET and its  
288 physiological role in *E. faecalis*. We show that iron induces expression of the genes encoding  
289 the sortase-assembled Ebp, which in turn associate with iron via the MIDAS motif of the  
290 EbpA tip adhesin, and promote biofilm formation. We also show that EET is dependent on  
291 both DMK in the electron transport chain, and a specialized flavin-associated respiratory  
292 complex, leading to reduction of extracellular iron and FeoB-mediated uptake of iron (**Figure**  
293 **6**). Furthermore, we demonstrate that pili are important for colonization in the iron-loaded  
294 mouse GI tract.

295

296 Many microorganisms have the capacity to generate electrical current via dissimilatory metal  
297 reduction<sup>22,34,35</sup>. In *E. faecalis*, it was previously known that EET relies upon DMK, part of  
298 its minimal electron transport chain<sup>27</sup>, as well as Ldh1, involved in cellular redox

299 homeostasis<sup>36</sup>. Here we confirm that *menB*, required for DMK synthesis<sup>37</sup>, contributes to  
300 EET, along with a recently reported flavin-associated alternative membrane-bound electron  
301 transport chain<sup>26</sup>. Since mutation of either pathway results in decreased charge production  
302 and ferric iron reduction, whereas mutation of both pathways completely abrogates both  
303 activities, we suggest that electrons flow through both respiratory complexes for maximally  
304 efficient EET and ferric iron reduction. While the precise mechanism for electron transfer  
305 outside of the *E. faecalis* cell may vary depending on the environmental niche, like *L.*  
306 *monocytogenes*<sup>26</sup>, *E. faecalis* is a flavin auxotroph<sup>38</sup>, necessitating the presence of this  
307 soluble electron shuttle in the vicinity of the microbes. Indeed, addition of riboflavin to *E.*  
308 *faecalis* biofilms growing in microbial fuel cells augments current production<sup>39</sup>. Our work  
309 also demonstrates that *E. faecalis* can use iron as a terminal acceptor for EET, which is likely  
310 relevant both in the outside environment where Enterococci can persist for long periods of  
311 time<sup>40</sup>, as well as in the GI tract where less than 15% of dietary iron is absorbed at the  
312 duodenum, leaving the majority destined for excretion<sup>41</sup> and potentially available for EET. In  
313 addition, there are likely alternative terminal electron acceptors available for EET in the GI  
314 tract, such as host associated iron, host-derived nitrate, or microbially-derived molecules such  
315 as humic substances<sup>42</sup>.

316

317 We previously demonstrated that *E. faecalis* biofilms, but not planktonic cells, grow better  
318 upon iron supplementation<sup>21</sup>. We further showed that iron deposits accumulate in the *E.*  
319 *faecalis* biofilm matrix<sup>21</sup>, which is composed of extracellular DNA<sup>43,44</sup> as well as, most  
320 likely, sortase substrates including Ebp that are continuously shed from wild type cells<sup>6,9</sup>.  
321 Here we show that the same pili are required for the formation of biofilm matrix-associated  
322 iron deposits, and are both essential for iron-augmented biofilm formation and necessary for  
323 EET. We speculate that Ebp contribute to EET in *E. faecalis* by sequestering iron as terminal

324 electron acceptors in close proximity to the cells, either as surface attached pili or within the  
325 tightly packed biofilm matrix, for efficient EET.

326

327 Both pilus associated EET and biofilm formation depend on an intact MIDAS motif within  
328 the EbpA pilus tip adhesin of a fully polymerized pilus. Ebp also co-purifies with iron in a  
329 MIDAS-dependent manner, demonstrating for the first time that the MIDAS motif

330 contributes to the association of a protein with iron. Indeed, our structural model of EbpA  
331 aligns well with other pilus adhesin tips such as *S. agalactiae* GBS104 and *S. pneumoniae*

332 RrgA, with a vWFA fold and MIDAS motif configured for binding cationic metals<sup>76,77</sup>.

333 MIDAS motifs have been shown to bind a range of cationic metals, but in the case of EbpA  
334 this can include Fe<sup>3+</sup> due to the local available concentrations in iron-rich environments.

335 Apart from binding metals, MIDAS motifs also form part of substrate binding sites, whereby

336 iron binding to this site could influence the interaction of EbpA with biofilm factors to

337 promote an increase in biofilm mass<sup>78</sup>. Collectively, our data confirm that iron binding at the

338 MIDAS motif has a dual role as both a terminal electron acceptor for EET and to promote

339 biofilm formation. Moreover, vWFA domains can undergo conformational changes to open

340 and closed states<sup>78</sup>, so it is tempting to speculate that such a conformational change may

341 have a role in the interaction with biofilm promoting factors and/or the release of iron after its

342 reduction to Fe<sup>2+</sup>.

343

344 Consistent with an important role for Ebp pili in an iron-rich environment, we show that the

345 *ebp* operon is transcriptionally induced when iron is supplemented. Ebp are displayed on the

346 surface of a subset of cells in any given *E. faecalis* population<sup>5,6,9,29,45</sup>, and this population

347 can be increased in the presence of serum<sup>5</sup> and bicarbonate<sup>46</sup>. Here we add another

348 environmental signal, iron abundance, that can influence Ebp expression. Several intrinsic

349 factors can impact *ebp* gene expression including transcriptional regulators, EbpR<sup>47</sup>, AhrC  
350 (also annotated as ArgR3) and ArgR2<sup>48</sup>, the FsrB quorum sensing peptide<sup>49</sup> and the RNA  
351 processing enzyme RNase J2<sup>50,51</sup>. While none of these factors were differentially regulated  
352 upon iron supplementation which may suggest uncharacterized regulatory pathways are  
353 responsible for iron-regulated *ebp* transcription, we cannot rule out the possibility that excess  
354 iron impacts the function of these known regulators of *ebp* expression.

355

356 In addition to *ebp*, the only iron-regulated *E. faecalis* gene annotated as iron-associated was  
357 *feoB*, involved in ferrous iron uptake. Our discoveries that 1) Ebp expressing cells aggregate  
358 within the biofilm, 2) *E. faecalis* accumulate intracellular iron in an Ebp-, EbpA MIDAS-,  
359 and FeoB-dependent manner, and that 3) intracellular iron accumulation is abrogated in the  
360 absence of EET and ability for ferric iron reduction, together suggest the presence of spatially  
361 segregated areas within the biofilm that may be especially enriched for ferric iron  
362 sequestration and reduction, subsequent ferrous iron acquisition, leading to biofilm growth  
363 and restructuring. Our observation that *E. faecalis* can combine dissimilatory metal reduction  
364 with iron acquisition is similar to early reports for *Shewanella putrefaciens*<sup>52</sup>. However, the  
365 precise mechanism by which iron acquisition contributes to *E. faecalis* biofilm formation is  
366 currently under investigation.

367

368 Enterococci are common but minor members of the GI microbiome. However, antibiotic  
369 mediated dysbiosis favors overgrowth of Enterococci, harbouring both intrinsic and acquired  
370 antibiotic resistance, in the lower GI tract<sup>53-56</sup>. In addition, their inherent tolerance to  
371 oxidative stress<sup>57</sup> and high concentration of metals<sup>21,58,59</sup> can provide a selective advantage  
372 for *E. faecalis* to colonize and bloom in niches unfavorable to other microbes. Our

373 observation that *E. faecalis* can both use EET and take advantage of iron-overload in the GI  
374 tract provides yet another mechanism by which *E. faecalis* can thrive in this niche.

375

376 Collectively, the findings of this study demonstrate that Ebp and EET facilitate iron reduction  
377 for its subsequent uptake, biofilm augmentation, and virulence in the antibiotic treated gut.

378 Given the strong conservation of sortase-assembled pili containing MIDAS motifs in their tip

379 adhesins among Gram positive pathogens, along with the conservation of genes encoding

380 EET components in the same organisms, we propose that pilus-mediated metal capture and

381 acquisition may be a common mechanism used by microbes to acquire limiting nutrients in a

382 diversity of niches. This work therefore raises the possibility for new therapeutic strategies

383 for *E. faecalis*, and potentially many other pathogens, aimed inhibiting extracellular electron

384 flow, iron reduction and acquisition, and EET-associated ATP production.

385

## 386 **Materials and Methods**

387 **Bacterial Strains and Growth Conditions.** *E. faecalis* was grown in Brain Heart Infusion

388 broth (BHI; Becton, Dickinson and Company, Franklin Lakes, NJ) and cultured at 37°C

389 under static or shaking (200rpm) conditions, as indicated. Preparation of inocula for biofilm

390 and planktonic growth assays was performed as previously described following growth in

391 Tryptic Soy Broth (TSB) or agar, supplemented with 0.175% glucose (TSBG) (Oxoid Inc.,

392 Ontario, Canada)<sup>21</sup>. Bacterial strains used in this study are listed in **Table S2**. Where

393 appropriate, strains harbouring pGCP123 plasmids were grown in 1000 µg/mL kanamycin

394 (Sigma Aldrich, USA) and strains harbouring pMSP3535 plasmids were grown in 100 µg/mL

395 erythromycin unless stated otherwise. Metals were filtered sterilized and supplemented

396 during medium preparation in autoclaved TSBG media. For experiments using ferric chloride

397 only, metal is supplemented in TSBG media and autoclaved together. Ferric citrate hydrate



398  $\geq 98\%$ , magnesium chloride anhydrous  $\geq 98\%$ , copper chloride dihydrate  $\geq 99\%$ , ferrous  
399 sulphate heptahydrate  $\geq 99\%$ , ferric sulphate hydrate  $\geq 97\%$ , ferric chloride anhydrous  $\geq 99\%$ ,  
400 heme  $\geq 90\%$ , and the chelator 2,2'-dipyridyl  $\geq 99\%$  were all supplied by Sigma Aldrich, St  
401 Louis, MO, USA. Manganese chloride tetrahydrate and zinc chloride were supplied by Merk  
402 Millipore, Singapore.

403

404 **General cloning techniques.** Both *menB* and *ndh3* nucleotide sequences are based on the *E.*  
405 *faecalis* OG1RF genome obtained from BioCyc<sup>60</sup>. The Wizard genome DNA purification kit  
406 (Promega Corp., Madison, WI) was used for isolation of bacterial genomic DNA (gDNA),  
407 and Monarch® Plasmid miniprep Kit (New England BioLabs, Ipswich, MA) was used for  
408 purification of plasmid for gene expression and construction of deletion mutant. The  
409 Monarch® DNA Gel Extraction Kit (New England BioLabs, Ipswich, MA) was used to  
410 isolate PCR products during extension overlay PCR. In-Fusion HD Cloning Kit (TaKara Bio,  
411 USA) was used for fast, directional cloning of DNA fragments into vector for both  
412 expression vector and in-frame deletion vector. All plasmids used in the study are listed in  
413 **Table S3**. T4 DNA ligase and restriction endonucleases were purchased from New England  
414 BioLabs (Ipswich, MA). Colony PCR was performed using Taq DNA polymerase (Thermo  
415 Fisher Scientific, Waltham, MA, USA) and PCR of gene of interest for plasmid construction  
416 was performed using Phusion DNA polymerase (Thermo Fisher Scientific, Waltham, MA,  
417 USA). Ligations were transformed into *E. coli* Dh5 $\alpha$  cells. Plasmids derived in this study  
418 were confirmed by sequencing of purified plasmid.

419

420 **Strain construction.** To construct *menB* and *ndh3* complementation plasmids, primers  
421 (*menB*\_F' and *menB*\_R' for *menB*, or *ndh3*\_F' and *ndh3*\_R' for *ndh3*; **Table S3**) were  
422 designed with BamHI restriction site or SpeI restriction sites flanking the gene of interest, to

423 generate DNA fragments as templates for In-Fusion cloning (Takara Bio USA Inc.) using  
424 primers (menB\_F'\_Infusion and menB\_R'\_Infusion for *menB*, or ndh3\_F'\_Infusion and  
425 ndh3\_R'\_Infusion for *ndh3*) with at least 15 bp complementary sequence for ligation into the  
426 nisin-inducible vector pMSP3535 digested with the same restriction enzymes. Both  
427 pMSP3535::*menB* and pMSP3535::*ndh3* plasmids were generated in *E. coli* Dh5 $\alpha$ , verified  
428 by sequencing, and transformed into *E. faecalis* as described previously<sup>13</sup>. Deletion of the  
429 *menB* coding sequence from the OG1RF chromosome was accomplished by allelic  
430 replacement using pGCP213 temperature sensitive shuttle vector as described previously<sup>13</sup>.  
431 The deletion allele was constructed by extension overlap PCR, consisting of the upstream  
432 (IFD\_menB\_Frag2\_F' and IFD\_menB\_Frag2\_R'; **Table S3**) and downstream  
433 (IFD\_menB\_Frag1\_F' and IFD\_menB\_Frag1\_R'; **Table S3**) of the *menB* coding sequence,  
434 and introduced into pGCP213 using in-fusion cloning with IFD\_menB\_Frag2\_F' and  
435 IFD\_menB\_Frag1\_R' primers which has at least 15 bp complementary. Deletion of *menB*  
436 was performed in *ndh3*::Tn parent strain to generate a double mutant. Transformants were  
437 PCR screened for in-frame deletion as previously described<sup>13</sup>.

438

439 **Immunofluorescence Imaging and 3D Reconstruction of Biofilm.** Bacterial cultures were  
440 normalized to OD<sub>600</sub> 0.7 and diluted 1000x prior inoculating into each well of  $\mu$ -Slide 8 well  
441 glass bottom slides (ibiTreat coated) (ibidi Inc., USA) containing 40% v/v TSBG for  
442 incubation at 37°C under static conditions for 24 hours. After incubation, adherent biofilm  
443 was fixed in 4% paraformaldehyde (Sigma Aldrich, USA)-PBS for 30 minutes, blocked with  
444 3% bovine serum albumin (Sigma Aldrich, USA) (BSA)-PBS for 30 minutes, and incubated  
445 with primary antibody (Rabbit Anti-Group D antigen, Thermo Scientific Singapore) or  
446 Guinea Pig Anti-EbpC<sup>45</sup> at 1:500 dilution for 30 minutes. The biofilm was then washed with  
447 3% BSA-PBS and incubated with secondary antibody (IgG horseradish peroxidase-

448 conjugated anti-rabbit or anti guinea-pig, Thermo Scientific Singapore) at 1:500 dilution for  
449 30 minutes and washed with 3% BSA-PBS. Biofilms were hydrated with PBS prior to  
450 imaging. Biofilm morphology, biomass, and cell distribution were analysed by confocal laser  
451 scanning microscopy (CLSM). Images were acquired using LSM780 confocal microscope  
452 (Zeiss, Germany) equipped with 63x/1.4 Oil DIC M27 and controlled by ZEN software.  
453 Samples were illuminated with 488 nm and 561nm Argon laser line; GFP emitted  
454 fluorescence was collected in the 493-580 nm range and RFP emitted fluorescence was  
455 collected in the 568-712 nm range. Optical sections (134.95x134.95  $\mu\text{m}$ ) were collected  
456 every 0.637  $\mu\text{m}$  through the entire biofilm thickness and signal from each section was  
457 averaged 4 times. Fiji software was used for further processing (levels adjustment, stack  
458 resliced). To visualize the biofilm spatial organization coordinates representing cocci position  
459 were plotted as spheres with cell-size diameter as described previously<sup>21</sup>. For each cell, local  
460 density was calculated as number of neighbour cells within 4 $\mu\text{m}$  radius, normalized and  
461 visualized using colour gradient.

462

463 **Biofilm Assay.** Bacterial cultures were normalized as previously described<sup>21</sup> and inoculated  
464 in TSBG in a 96-well flat bottom transparent microtiter plate (Thermo Scientific, Waltman,  
465 MA, USA), and incubated at 37°C under static conditions for 5 days unless specified  
466 otherwise. Strains harboring pGCP123 complementation plasmids were grown in the  
467 presence of kanamycin prior to the biofilm assay, but kanamycin was not added to the biofilm  
468 assay itself because we found that kanamycin precipitates in the presence of excess iron  
469 leading to aberrant biofilm formation (data not shown). Adherent biofilm biomass was  
470 stained using 0.1% w/v crystal violet (Sigma-Aldrich, St Louis, MO, USA) at 4°C for 30  
471 minutes. The microtiter plate was washed twice with PBS followed by crystal violet  
472 solubilization with ethanol:acetone (4:1) for 45 minutes at room temperature. Quantification

473 of adherent biofilm biomass was measured by absorbance at OD<sub>595nm</sub> using a Tecan Infinite  
474 200 PRO spectrophotometer (Tecan Group Ltd., Männedorf, Switzerland).

475

476 **Planktonic Growth Assay.** Bacterial cultures were normalized as previously described<sup>21</sup>  
477 and serially diluted by a dilution factor of 200. Diluted cultures were inoculated into the  
478 media at a ratio of 1:25, which is 8 µL of the inoculum in 200 µL of media, incubated at 37°C  
479 for 18 hours, and absorbance at OD<sub>600nm</sub> was measured using a Tecan Infinite 200 PRO  
480 spectrophotometer (Tecan Group Ltd., Männedorf, Switzerland) at 15 minute intervals.

481

482 **Population Analysis of Pilus Expression.** Biofilms were grown in 6 well tissue culture  
483 plates at 37°C under static conditions for 24 hours in TSBG or TSBG supplemented with  
484 metals where appropriate, and planktonic cultures were grown in 50-ml falcon tube under  
485 shaking conditions (200 rpm). Immunoblotting was performed as described previously<sup>61</sup> with  
486 some modification. Spent media was removed, and the adherent biofilm was suspended in  
487 PBS. A cell scraper was used to dislodge the biofilm, and the dislodged cells were  
488 centrifuged at 14,000 rpm for 2 minutes at room temperature to remove the supernatant.  
489 Biofilm cells were suspended in PBS and normalized to OD<sub>600nm</sub> 1.0. Normalized  
490 suspensions were fixed in 4% paraformaldehyde (Sigma Aldrich, USA)-PBS for 20 minutes  
491 at 4 °C, centrifuged at 14,000 rpm for 2 minutes. and the supernatant then discarded. The  
492 pellets were washed with PBS, centrifuged at 14,000 rpm for 2 minutes, and the supernatant  
493 discarded again. Immunofluorescence microscopy was performed as described previously<sup>61</sup>  
494 with the following modifications: 1:500 dilution of guinea pig anti-EbpC (Thermo Scientific,  
495 Singapore) in PBS-3% bovine serum albumin, and 1:500 dilution of goat Anti-guinea pig  
496 AlexaFluor-568 (Invitrogen Inc., USA) incubation for 30 minutes. After washing with PBS  
497 twice, resuspended cells were applied to poly-L-lysine slides (Polysciences Inc., USA), dried

498 for 5 minutes, mounted with Vectashield®, and sealed with a cover slip. Images were  
499 acquired using an inverted Epi-fluorescence microscope (Zeiss Axio observer Z1, Germany)  
500 equipped with an EC Plan-Neofluar 100x/1.3 Oil objective and controlled by ZEN software.  
501 For each biological sample, 5 images were acquired and the percentage of the cell population  
502 expressing pili was quantified. At least 300 bacterial cells per strain per experiment were  
503 scored for pilus expression. The metal concentrations used during the pilus expression  
504 experiments were based on the highest concentration in which *E. faecalis* cells did not exhibit  
505 growth inhibition (data not shown).

506

507 **EbpA Structural Modelling.** The EbpA amino acid sequence was submitted to the structural  
508 homology-modelling server Swiss-Model (<https://swissmodel.expasy.org>)<sup>62</sup>. Template  
509 structures for structural modelling were automatically selected based upon sequence identity.  
510 The initial template search derived 723 templates that were filtered down to 50 templates,  
511 whereby 14 models were constructed and ranked based on sequence similarity and coverage.  
512 The top solution was based upon the PDB 3txa (GBS104 from *Streptococcus agalactiae*) that  
513 showed 34% sequence similarity and 38% sequence coverage. The final EbpA model  
514 included N177-P620. The Fe<sup>3+</sup> was created with Sketcher<sup>63</sup> and placed into position using  
515 the MIDAS bound magnesium of 3txa and 2ww8 as a guide with the program COOT<sup>64</sup>. The  
516 two conserved water molecules from both 3txa and 2ww8 were fitted into EbpA by a similar  
517 means. Final alignments, analysis and structural figures were created with PyMOL<sup>65</sup>.

518

519 **Quantitative Real time PCR (qRT-PCR) and RNA sequencing.** Biofilm cells were  
520 prepared as described above for TEM. After washing, the biofilm cell pellet was incubated  
521 with lysozyme from chicken egg white (10mg/ml) (Sigma Aldrich, USA) for 30 minutes at  
522 37°C to remove the cell wall and centrifuged at 14,000 rpm for 2 minutes at room

523 temperature to remove supernatant prior to cell lysis. RNA extraction was performed in a  
524 Purifier® filtered PCR enclosure using the PureLink™ RNA mini kit (Invitrogen, USA)  
525 according to the manufacturer's instructions. RNA purification and removal of DNA was  
526 performed using TURBO DNA-free™ kit (Thermo Fisher, USA) and Agencourt®  
527 RNAClean® XP Kit (Beckman Coulter, USA). Measurement of RNA yield and quality was  
528 performed using Qubit® RNA HS assay kit (Thermo Fisher, USA) and RNA ScreenTape  
529 System and 2200 TapeStation (Agilent, USA). Synthesis of cDNA was performed using  
530 SuperScript III First-strand (Invitrogen, USA). Quantitative real-time PCR using cDNA was  
531 performed using KAPA SYBR fast qPCR master mix kit (Sigma Aldrich, USA) and Applied  
532 Biosystems StepOne Plus Real-Time PCR system. The expression of *ebpC*, *ebpR*, *srtA*, *srtC*,  
533 *argR3* and *gyrA* were analysed using primer pairs listed in **Table S2**. For each primer set, a  
534 standard curve was established using genomic DNA from *E. faecalis* OG1RF. Normalized  
535 concentrations of cDNA were used to determine the relative fold change in gene expression  
536 as compared to *E. faecalis* OG1RF biofilm grown in TSBG. For RNA sequencing, ribosomal  
537 RNA depletion was performed after RNA purification using Ribo-Zero™ rRNA removal kit  
538 (Illumina, USA). cDNA library synthesis was performed using NEBNext RNA First-strand  
539 and NEBNext Ultra directional RNA Second-strand synthesis module (New England BioLab,  
540 US). Transcriptome library preparation was performed using 300bp paired end Illumina  
541 sequencing.

542

543 **Pilus Extraction and Purification.** Cell surface protein extracts from biofilms were prepared  
544 as described previously<sup>5</sup> with minor modifications. Biofilms were grown cells dislodged as  
545 described above for TEM. Dislodged biofilm cells were centrifuge at 3300 g for 4 minutes at  
546 15°C, washed with Tris buffer (10 mM Tris-HCl pH 8, 1 mM EDTA, 1 mM DTT) and  
547 suspended in protoplast buffer with Pierce™ protease inhibitors (Thermo Scientific, USA).

548 Mutanolysin from *Streptomyces globisporus* ATCC 21553 (Sigma Aldrich, USA) and  
549 benzonase nuclease (Sigma Aldrich, USA) were added and incubated at 37°C for 6 hours  
550 with shaking (200 rpm). Following incubation, biofilm cells were centrifuged at 3300 g for 4  
551 minutes, 15°C to obtain the supernatant. Supernatants were filtered through a 0.45µm Supor®  
552 membrane (Sigma Aldrich, USA) and loaded into Corning Spin-X UF concentrators (MWCO  
553 100kDa) (Sigma Aldrich, USA), centrifuged for 20 minutes, 15°C at 6000 g, and dialyzed  
554 using Tris buffer using Spectra/Por® Float-A-Lyzer® G2 dialysis device (MWCO 300kDa)  
555 (Spectrum Labs, USA). Pilus extracts were collected, quantified using Nanodrop 2000  
556 Spectrophotometer (ThermoFisher, USA), and normalized to 5 µg per sample. Samples were  
557 mixed with an equal volume of NuPAGE® Tris-glycine native sample buffer (Novex®) and  
558 loaded on to NuPAGE™ 3-8% Tris-acetate gel (ThermoFisher, USA). Gel blots were run at  
559 150 V for 3 hours. Western blotting was performed as described previously<sup>6</sup> with minor  
560 modifications. Membranes were blocked in 0.05% v/v Tween-3% v/v bovine serum albumin-  
561 PBS (Sigma Aldrich, USA) overnight at 4 °C and washed twice with 0.05% v/v Tween  
562 (Sigma Aldrich, USA)-PBS prior to incubation with primary and secondary antibodies, and  
563 prior to incubation with detection substrate. Primary antibody (guinea pig Anti-EbpC<sup>45</sup> or  
564 rabbit Anti-SecA<sup>6</sup>) diluted 1:1500, and secondary antibody (IgG guinea pig or rabbit  
565 conjugated horseradish peroxidase) diluted 1:4000 were used. Protein was detected using  
566 SuperSignal® west femto maximum sensitivity substrate kit (Thermo Scientific, USA).

567

568 **Inductive-Coupled Plasma Mass Spectrometry (ICP-MS).** Pilus extracts, normalized to  
569 5µg per sample, were run under native condition as described above. Using the western blot  
570 prepared gel as a reference, a separate identical NuPAGE™ Tris-acetate gel (ThermoFisher,  
571 USA) was cut to isolate pilus extract ladder above a molecular weight of 100 kDa. At a ratio  
572 of 2:1, 70% nitric acid (Sigma Aldrich, USA) and 30% hydrogen peroxide (Sigma Aldrich,

573 USA) was added to the excised gel slice containing the pilus protein, and left under room  
574 temperature for 3 days to allow complete digestion. The digested samples were diluted with  
575 LC-MS grade water and filtered using 0.2  $\mu\text{m}$  membrane, prior to analysis using ICP-MS.  
576 Analysis of trace metals in samples was performed using ICP-MS model Elan-DRCe,  
577 Meinhard Nebulizer model TR-30-C3 (Perkin Elmer; Model: N8122006 (Elan Standard  
578 Torch)).

579

580 **Electrochemical Assay and Analysis.** Screen printed electrodes (SPE) (model DRP-C110;  
581 DropSens, Spain) consisting of a 4 mm diameter carbon working electrode, carbon counter  
582 electrode, and a Ag pseudo-reference electrode were controlled by a multichannel  
583 potentiostat (VSP, Bio-Logic, France) in an electrochemical cell of 9 mL working volume  
584 sealed with a Teflon cap. Chronoamperometry was performed as previously described with  
585 minor modifications<sup>21</sup>. All electrochemical experiments were conducted at 37°C in TSBG  
586 medium supplemented with 1 mM FeCl<sub>3</sub> unless otherwise stated.

587

588 **Ferrozine assay of ferric iron reductase activity.** *E. faecalis* cells were normalized to  
589 OD<sub>600nm</sub> 0.7, diluted 1:200 in PBS and resuspended in TSBG supplemented with 2 mM iron  
590 (III) chloride as previously described<sup>21</sup> and then supplemented with 0.5 mM ferrozine.  
591 Experiments were performed as previously described with minor modification<sup>26</sup>. OD<sub>592nm</sub>  
592 measurements were made every 2 mins for up to 7 hours on *E. faecalis* biofilms grown  
593 statically. Corresponding change in optical density measurements correlates with color  
594 change due to ferrous iron binding to ferrozine after ferric iron is reduced to ferrous iron.

595

596 **Mouse Gastrointestinal Tract (GI) Infection Model.** Three week old male C57BL/6NTac  
597 mice were administered ampicillin (VWR, USA) in their drinking water (1 g/L) for 5 days as



598 previously described<sup>53,55</sup>. Mice were then given one day of recovery from antibiotic  
599 treatment prior to administration of approximately  $1-5 \times 10^8$  CFU/ml *E. faecalis* (OD<sub>600nm</sub>  
600 0.5) in the drinking water for 3 days as previously described<sup>66</sup>. Before and after infection,  
601 mice were monitored for signs of disease and weight loss. All animal experiments were  
602 approved and performed in compliance with the Nanyang Technological University  
603 Institutional Animal Care and Use Committee (IACUC). For dietary manipulation,  
604 customized synthesized diets (C1038 iron deficient diet with 200 mg/kg ferric chloride as  
605 control diet, C1038 iron deficient diet with 2000 mg/kg ferric chloride as high iron diet)  
606 (Altromin, Germany) were given to mice prior to infection and throughout infection. Mice  
607 were kept on customized diets for 3 weeks before administering ampicillin as previously  
608 described with minor modification in the synthesized diet<sup>67,68</sup>. At the indicated timepoints,  
609 the small intestine, colon, and cecum were harvested. Tissue samples were homogenised in  
610 PBS, serial diluted in PBS, and spot-plated on BHI agar with 10 mg/L colistin, 10 mg/L  
611 nalidixic acid, 100 mg/L rifampicin, 25 mg/L fusidic acid for CFU enumeration. All  
612 antibiotics were obtained from Sigma Aldrich, USA.

613

#### 614 **Authors Contributions**

615 L.N.L and K.A.K. conceptualized the study. L.N.L, E.M and K.A.K designed the  
616 experiments, analyzed the data and prepared the manuscript. L.N.L performed biofilm  
617 experiments, immuno-fluorescence assays, ICP-MS, and analyzed the data. A.M analyzed the  
618 confocal data and generated 3D reconstruction models. L.N.L, P.M.L., Z.S.C, and E.M  
619 performed the electrochemistry experiments and analyzed the data. L.N.L and J.J.W  
620 performed mouse GI experiments and analyzed the data. L.N.L prepared the RNA samples  
621 for RNA sequencing and K.K.L.C analyzed the data. J.P. and B.H. performed modeling  
622 experiments. All authors reviewed the manuscript.

623

## 624 **Acknowledgments**

625 This work was supported by the National Research Foundation and Ministry of Education  
626 Singapore under its Research Centre of Excellence Programme and by the Ministry of  
627 Education Singapore under its Tier 2 programme (MOE2014-T2-2-124). Artur Matysik was  
628 supported by the National Medical Research Council under its Clinical Basic Research Grant  
629 (NMRC/CBRG/0086/2015). We thank Wandy Betty (Washington University, St Louis,  
630 USA) for performing TEM, Hailyn V. Nielsen and Scott Hultgren (Washington University,  
631 St Louis, USA) for providing the pilus mutants, and Gary Dunny (University of Minnesota)  
632 for providing transposon mutants. Finally, we thank Sam Light and Dan Portnoy (University  
633 of California, Berkeley) for sharing unpublished data and for critical discussions of the  
634 manuscript.

635

## 636 **References**

- 637 1 Ch'ng, J. H., Chong, K. K. L., Lam, L. N., Wong, J. J. & Kline, K. A. Biofilm-associated infection  
638 by enterococci. *Nature reviews. Microbiology* **17**, 82-94, doi:10.1038/s41579-018-0107-z  
639 (2019).
- 640 2 O'Driscoll, T. & Crank, C. W. Vancomycin-resistant enterococcal infections: epidemiology,  
641 clinical manifestations, and optimal management. *Infection and drug resistance* **8**, 217-230,  
642 doi:10.2147/idr.s54125 (2015).
- 643 3 Nallapareddy, S. R. *et al.* Conservation of Ebp-type pilus genes among Enterococci and  
644 demonstration of their role in adherence of *Enterococcus faecalis* to human platelets.  
645 *Infection and immunity* **79**, 2911-2920, doi:10.1128/iai.00039-11 (2011).
- 646 4 Nallapareddy, S. R., Singh, K. V., Sillanpaa, J., Zhao, M. & Murray, B. E. Relative contributions  
647 of Ebp Pili and the collagen adhesin ace to host extracellular matrix protein adherence and  
648 experimental urinary tract infection by *Enterococcus faecalis* OG1RF. *Infection and immunity*  
649 **79**, 2901-2910, doi:10.1128/iai.00038-11 (2011).
- 650 5 Nallapareddy, S. R. *et al.* Endocarditis and biofilm-associated pili of *Enterococcus faecalis*.  
651 *The Journal of clinical investigation* **116**, 2799-2807, doi:10.1172/jci29021 (2006).
- 652 6 Nielsen, H. V. *et al.* Pilin and sortase residues critical for endocarditis- and biofilm-associated  
653 pilus biogenesis in *Enterococcus faecalis*. *Journal of bacteriology* **195**, 4484-4495,  
654 doi:10.1128/jb.00451-13 (2013).
- 655 7 Singh, K. V., Nallapareddy, S. R. & Murray, B. E. Importance of the ebp (endocarditis- and  
656 biofilm-associated pilus) locus in the pathogenesis of *Enterococcus faecalis* ascending urinary  
657 tract infection. *J Infect Dis* **195**, 1671-1677 (2007).

- 658 8 Sillanpää, J., Xu, Y., Nallapareddy, S. R., Murray, B. E. & Höök, M. A family of putative  
659 MSCRAMMs from *Enterococcus faecalis*. *Microbiology* **150**, 2069-2078,  
660 doi:doi:10.1099/mic.0.27074-0 (2004).
- 661 9 Kline, K. A. *et al.* Mechanism for sortase localization and the role of sortase localization in  
662 efficient pilus assembly in *Enterococcus faecalis*. *Journal of bacteriology* **191**, 3237-3247,  
663 doi:10.1128/JB.01837-08 (2009).
- 664 10 Plow, E. F., Haas, T. A., Zhang, L., Loftus, J. & Smith, J. W. Ligand Binding to Integrins. *Journal*  
665 *of Biological Chemistry* **275**, 21785-21788, doi:10.1074/jbc.R000003200 (2000).
- 666 11 Bergelson, J. M. & Hemler, M. E. Integrin-ligand binding. Do integrins use a 'MIDAS touch' to  
667 grasp an Asp? *Current biology : CB* **5**, 615-617 (1995).
- 668 12 Whittaker, C. A. & Hynes, R. O. Distribution and evolution of von Willebrand/integrin A  
669 domains: widely dispersed domains with roles in cell adhesion and elsewhere. *Molecular*  
670 *biology of the cell* **13**, 3369-3387, doi:10.1091/mbc.e02-05-0259 (2002).
- 671 13 Nielsen, H. V. *et al.* The Metal Ion-Dependent Adhesion Site Motif of the *Enterococcus*  
672 *faecalis* EbpA Pilin Mediates Pilus Function in Catheter-Associated Urinary Tract Infection.  
673 *mBio* **3**, e00177-00112, doi:10.1128/mBio.00177-12 (2012).
- 674 14 Flores-Mireles, A. L., Pinkner, J. S., Caparon, M. G. & Hultgren, S. J. EbpA vaccine antibodies  
675 block binding of *Enterococcus faecalis* to fibrinogen to prevent catheter-associated bladder  
676 infection in mice. *Science translational medicine* **6**, 254ra127-254ra127,  
677 doi:10.1126/scitranslmed.3009384 (2014).
- 678 15 Schembri, M. A., Lo, A. W. & Ulett, G. C. Blocking the 'MIDAS' touch of *Enterococcus faecalis*.  
679 *Annals of translational medicine* **3**, S3-S3, doi:10.3978/j.issn.2305-5839.2015.03.32 (2015).
- 680 16 Proft, T. & Baker, E. N. Pili in Gram-negative and Gram-positive bacteria - structure, assembly  
681 and their role in disease. *Cellular and molecular life sciences : CMLS* **66**, 613-635,  
682 doi:10.1007/s00018-008-8477-4 (2009).
- 683 17 Danne, C. & Dramsi, S. Pili of Gram-positive bacteria: roles in host colonization. *Research in*  
684 *Microbiology* **163**, 645-658, doi:<https://doi.org/10.1016/j.resmic.2012.10.012> (2012).
- 685 18 Konto-Ghiorgi, Y. *et al.* Dual Role for Pilus in Adherence to Epithelial Cells and Biofilm  
686 Formation in *Streptococcus agalactiae*. *PLOS Pathogens* **5**, e1000422,  
687 doi:10.1371/journal.ppat.1000422 (2009).
- 688 19 Izore, T. *et al.* Structural basis of host cell recognition by the pilus adhesin from  
689 *Streptococcus pneumoniae*. *Structure (London, England : 1993)* **18**, 106-115,  
690 doi:10.1016/j.str.2009.10.019 (2010).
- 691 20 Becherelli, M. *et al.* The ancillary protein 1 of *Streptococcus pyogenes* FCT-1 pili mediates cell  
692 adhesion and biofilm formation through heterophilic as well as homophilic interactions.  
693 *Molecular microbiology* **83**, 1035-1047, doi:10.1111/j.1365-2958.2012.07987.x (2012).
- 694 21 Keogh, D. *et al.* Extracellular Electron Transfer Powers *Enterococcus faecalis* Biofilm  
695 Metabolism. *mBio* **9**, doi:10.1128/mBio.00626-17 (2018).
- 696 22 Shi, L. *et al.* Extracellular electron transfer mechanisms between microorganisms and  
697 minerals. *Nature reviews. Microbiology* **14**, 651-662, doi:10.1038/nrmicro.2016.93 (2016).
- 698 23 Weber, K. A., Achenbach, L. A. & Coates, J. D. Microorganisms pumping iron: anaerobic  
699 microbial iron oxidation and reduction. *Nature reviews. Microbiology* **4**, 752-764,  
700 doi:10.1038/nrmicro1490 (2006).
- 701 24 Sure, S. K., Ackland, L. M., Torriero, A. A., Adholeya, A. & Kochar, M. Microbial Nanowires: An  
702 Electrifying Tale. *Microbiology*, doi:10.1099/mic.0.000382 (2016).
- 703 25 Wang, F. *et al.* Structure of Microbial Nanowires Reveals Stacked Hemes that Transport  
704 Electrons over Micrometers. *Cell* **177**, 361-369.e310, doi:10.1016/j.cell.2019.03.029 (2019).
- 705 26 Light, S. H. *et al.* A flavin-based extracellular electron transfer mechanism in diverse Gram-  
706 positive bacteria. *Nature* **562**, 140-144, doi:10.1038/s41586-018-0498-z (2018).

- 707 27 Pankratova, G., Leech, D., Gorton, L. & Hederstedt, L. Extracellular Electron Transfer by the  
708 Gram-Positive Bacterium *Enterococcus faecalis*. *Biochemistry* **57**, 4597-4603,  
709 doi:10.1021/acs.biochem.8b00600 (2018).
- 710 28 Ramsey, M., Hartke, A. & Huycke, M. in *Enterococci: From Commensals to Leading Causes of*  
711 *Drug Resistant Infection* (eds M. S. Gilmore, D. B. Clewell, Y. Ike, & N. Shankar)  
712 (Massachusetts Eye and Ear Infirmary, 2014).
- 713 29 Sillanpaa, J. *et al.* Contribution of individual Ebp Pilus subunits of *Enterococcus faecalis*  
714 OG1RF to pilus biogenesis, biofilm formation and urinary tract infection. *PLoS one* **8**, e68813,  
715 doi:10.1371/journal.pone.0068813 (2013).
- 716 30 Krishnan, V. *et al.* Structure of *Streptococcus agalactiae* tip pilin GBS104: a model for GBS pilin  
717 assembly and host interactions. *Acta crystallographica. Section D, Biological crystallography*  
718 **69**, 1073-1089, doi:10.1107/S0907444913004642 (2013).
- 719 31 Shimaoka, M., Takagi, J. & Springer, T. A. Conformational regulation of integrin structure and  
720 function. *Annual review of biophysics and biomolecular structure* **31**, 485-516,  
721 doi:10.1146/annurev.biophys.31.101101.140922 (2002).
- 722 32 Kristich, C. J. *et al.* Development and use of an efficient system for random mariner  
723 transposon mutagenesis to identify novel genetic determinants of biofilm formation in the  
724 core *Enterococcus faecalis* genome. *Applied and environmental microbiology* **74**, 3377-3386,  
725 doi:10.1128/aem.02665-07 (2008).
- 726 33 Dale, J. L. *et al.* Comprehensive Functional Analysis of the *Enterococcus faecalis* Core  
727 Genome Using an Ordered, Sequence-Defined Collection of Insertional Mutations in Strain  
728 OG1RF. *mSystems* **3**, doi:10.1128/mSystems.00062-18 (2018).
- 729 34 Logan, B. E., Rossi, R., Ragab, A. a. & Saikaly, P. E. Electroactive microorganisms in  
730 bioelectrochemical systems. *Nature Reviews Microbiology*, doi:10.1038/s41579-019-0173-x  
731 (2019).
- 732 35 Logan, B. E. Exoelectrogenic bacteria that power microbial fuel cells. *Nature Reviews*  
733 *Microbiology* **7**, 375, doi:10.1038/nrmicro2113 (2009).
- 734 36 Rana, N. F. *et al.* Redox balance via lactate dehydrogenase is important for multiple stress  
735 resistance and virulence in *Enterococcus faecalis*. *Infection and immunity* **81**, 2662-2668,  
736 doi:10.1128/IAI.01299-12 (2013).
- 737 37 Huycke, M. M. *et al.* Extracellular superoxide production by *Enterococcus faecalis* requires  
738 demethylmenaquinone and is attenuated by functional terminal quinol oxidases. *Molecular*  
739 *microbiology* **42**, 729-740 (2001).
- 740 38 Vitreschak, A. G., Rodionov, D. A., Mironov, A. A. & Gelfand, M. S. Regulation of riboflavin  
741 biosynthesis and transport genes in bacteria by transcriptional and translational attenuation.  
742 *Nucleic acids research* **30**, 3141-3151 (2002).
- 743 39 Zhang, E., Cai, Y., Luo, Y. & Piao, Z. Riboflavin-shuttled extracellular electron transfer from  
744 *Enterococcus faecalis* to electrodes in microbial fuel cells. *Canadian journal of microbiology*  
745 **60**, 753-759, doi:10.1139/cjm-2014-0389 (2014).
- 746 40 Byappanahalli, M. N., Nevers, M. B., Korajkic, A., Staley, Z. R. & Harwood, V. J. Enterococci in  
747 the environment. *Microbiology and molecular biology reviews : MMBR* **76**, 685-706,  
748 doi:10.1128/MMBR.00023-12 (2012).
- 749 41 Benito, P. & Miller, D. Iron absorption and bioavailability: An updated review. *Nutrition*  
750 *Research* **18**, 581-603, doi:[https://doi.org/10.1016/S0271-5317\(98\)00044-X](https://doi.org/10.1016/S0271-5317(98)00044-X) (1998).
- 751 42 Saunders, S. H. & Newman, D. K. Extracellular Electron Transfer Transcends Microbe-Mineral  
752 Interactions. *Cell Host & Microbe* **24**, 611-613,  
753 doi:<https://doi.org/10.1016/j.chom.2018.10.018> (2018).
- 754 43 Guiton, P. S. *et al.* Contribution of autolysin and Sortase a during *Enterococcus faecalis* DNA-  
755 dependent biofilm development. *Infection and immunity* **77**, 3626-3638,  
756 doi:10.1128/iai.00219-09 (2009).

- 757 44 Thomas, V. C., Thurlow, L. R., Boyle, D. & Hancock, L. E. Regulation of autolysis-dependent  
758 extracellular DNA release by *Enterococcus faecalis* extracellular proteases influences biofilm  
759 development. *Journal of bacteriology* **190**, 5690-5698, doi:10.1128/jb.00314-08 (2008).
- 760 45 Afonina, I., Lim, X. N., Tan, R. & Kline, K. A. Planktonic Interference and Biofilm Alliance  
761 between Aggregation Substance and Endocarditis- and Biofilm-Associated Pili in  
762 *Enterococcus faecalis*. *Journal of bacteriology* **200**, doi:10.1128/jb.00361-18 (2018).
- 763 46 Bourgogne, A., Thomson, L. C. & Murray, B. E. Bicarbonate enhances expression of the  
764 endocarditis and biofilm associated pilus locus, *ebpR-ebpABC*, in *Enterococcus faecalis*. *BMC*  
765 *Microbiol* **10**, 17, doi:10.1186/1471-2180-10-17 (2010).
- 766 47 Bourgogne, A. *et al.* *EbpR* is important for biofilm formation by activating expression of the  
767 endocarditis and biofilm-associated pilus operon (*ebpABC*) of *Enterococcus faecalis* OG1RF.  
768 *Journal of bacteriology* **189**, 6490-6493, doi:10.1128/JB.00594-07 (2007).
- 769 48 Manias, D. A. & Dunny, G. M. Expression of Adhesive Pili and the Collagen-Binding Adhesin  
770 Ace Is Activated by ArgR Family Transcription Factors in *Enterococcus faecalis*. *Journal of*  
771 *bacteriology* **200**, doi:10.1128/jb.00269-18 (2018).
- 772 49 Bourgogne, A., Hilsenbeck, S. G., Dunny, G. M. & Murray, B. E. Comparison of OG1RF and an  
773 isogenic *fsrB* Deletion Mutant by Transcriptional Analysis: the *Fsr* System of *Enterococcus*  
774 *faecalis* Is More than the Activator of Gelatinase and Serine Protease. *Journal of bacteriology*  
775 **188**, 2875-2884, doi:10.1128/JB.188.8.2875-2884.2006 (2006).
- 776 50 Gao, P. *et al.* *Enterococcus faecalis* *rnjB* is required for pilin gene expression and biofilm  
777 formation. *Journal of bacteriology* **192**, 5489-5498, doi:10.1128/jb.00725-10 (2010).
- 778 51 Gao, P. *et al.* Functional studies of *E. faecalis* RNase J2 and its role in virulence and fitness.  
779 *PLoS one* **12**, e0175212, doi:10.1371/journal.pone.0175212 (2017).
- 780 52 Glasauer, S., Langley, S. & Beveridge, T. J. Intracellular iron minerals in a dissimilatory iron-  
781 reducing bacterium. *Science (New York, N.Y.)* **295**, 117-119, doi:10.1126/science.1066577  
782 (2002).
- 783 53 Ubeda, C. *et al.* Vancomycin-resistant *Enterococcus* domination of intestinal microbiota is  
784 enabled by antibiotic treatment in mice and precedes bloodstream invasion in humans. *The*  
785 *Journal of clinical investigation* **120**, 4332-4341, doi:10.1172/JCI43918 (2010).
- 786 54 Caballero, S. *et al.* Distinct but Spatially Overlapping Intestinal Niches for Vancomycin-  
787 Resistant *Enterococcus faecium* and Carbapenem-Resistant *Klebsiella pneumoniae*. *PLOS*  
788 *Pathogens* **11**, e1005132, doi:10.1371/journal.ppat.1005132 (2015).
- 789 55 Caballero, S. *et al.* Cooperating Commensals Restore Colonization Resistance to Vancomycin-  
790 Resistant *Enterococcus faecium*. *Cell Host Microbe* **21**, 592-602.e594,  
791 doi:10.1016/j.chom.2017.04.002 (2017).
- 792 56 La Rosa, S. L. *et al.* In vivo assessment of growth and virulence gene expression during  
793 commensal and pathogenic lifestyles of luxABCDE-tagged *Enterococcus faecalis* strains in  
794 murine gastrointestinal and intravenous infection models. *Applied and environmental*  
795 *microbiology* **79**, 3986-3997, doi:10.1128/aem.00831-13 (2013).
- 796 57 Riboulet, E. *et al.* Relationships between oxidative stress response and virulence in  
797 *Enterococcus faecalis*. *Journal of molecular microbiology and biotechnology* **13**, 140-146,  
798 doi:10.1159/000103605 (2007).
- 799 58 Aktan, Y., Tan, S. & Içgen, B. Characterization of lead-resistant river isolate *Enterococcus*  
800 *faecalis* and assessment of its multiple metal and antibiotic resistance. Vol. 185 (2012).
- 801 59 Colomer-Winter, C., Gaca, A. O. & Lemos, J. A. Association of Metal Homeostasis and  
802 (p)ppGpp Regulation in the Pathophysiology of *Enterococcus faecalis*. *Infection and*  
803 *immunity* **85**, doi:10.1128/iai.00260-17 (2017).
- 804 60 Karp, P. D. *et al.* The BioCyc collection of microbial genomes and metabolic pathways.  
805 *Briefings in bioinformatics*, doi:10.1093/bib/bbx085 (2017).

- 806 61 Kline, K. A. *et al.* Mechanism for Sortase Localization and the Role of Sortase Localization in  
807 Efficient Pilus Assembly in *Enterococcus faecalis*. *Journal of bacteriology* **191**, 3237-3247,  
808 doi:10.1128/jb.01837-08 (2009).
- 809 62 Waterhouse, A. *et al.* SWISS-MODEL: homology modelling of protein structures and  
810 complexes. *Nucleic Acids Res* **46**, W296-w303, doi:10.1093/nar/gky427 (2018).
- 811 63 Winn, M. D. *et al.* Overview of the CCP4 suite and current developments. *Acta Crystallogr D*  
812 *Biol Crystallogr* **67**, 235-242, doi:10.1107/s0907444910045749 (2011).
- 813 64 Emsley, P. & Cowtan, K. Coot: model-building tools for molecular graphics. *Acta Crystallogr D*  
814 *Biol Crystallogr* **60**, 2126-2132, doi:10.1107/s0907444904019158 (2004).
- 815 65 L DeLano, W. *The PyMOL Molecular Graphics System (2002) DeLano Scientific, Palo Alto, CA,*  
816 *USA.* <http://www.pymol.org>. (2002).
- 817 66 Banla, I. L. *et al.* Modulators of *Enterococcus faecalis* Cell Envelope Integrity and  
818 Antimicrobial Resistance Influence Stable Colonization of the Mammalian Gastrointestinal  
819 Tract. *Infection and immunity* **86**, e00381-00317, doi:10.1128/IAI.00381-17 (2017).
- 820 67 Zackular, J. P. *et al.* Dietary zinc alters the microbiota and decreases resistance to *Clostridium*  
821 *difficile* infection. *Nat Med* **22**, 1330-1334, doi:10.1038/nm.4174 (2016).
- 822 68 Juttukonda, L. J. *et al.* Dietary Manganese Promotes Staphylococcal Infection of the Heart.  
823 *Cell Host Microbe* **22**, 531-542.e538, doi:10.1016/j.chom.2017.08.009 (2017).

824

825

826

827

828

829

830

831

832

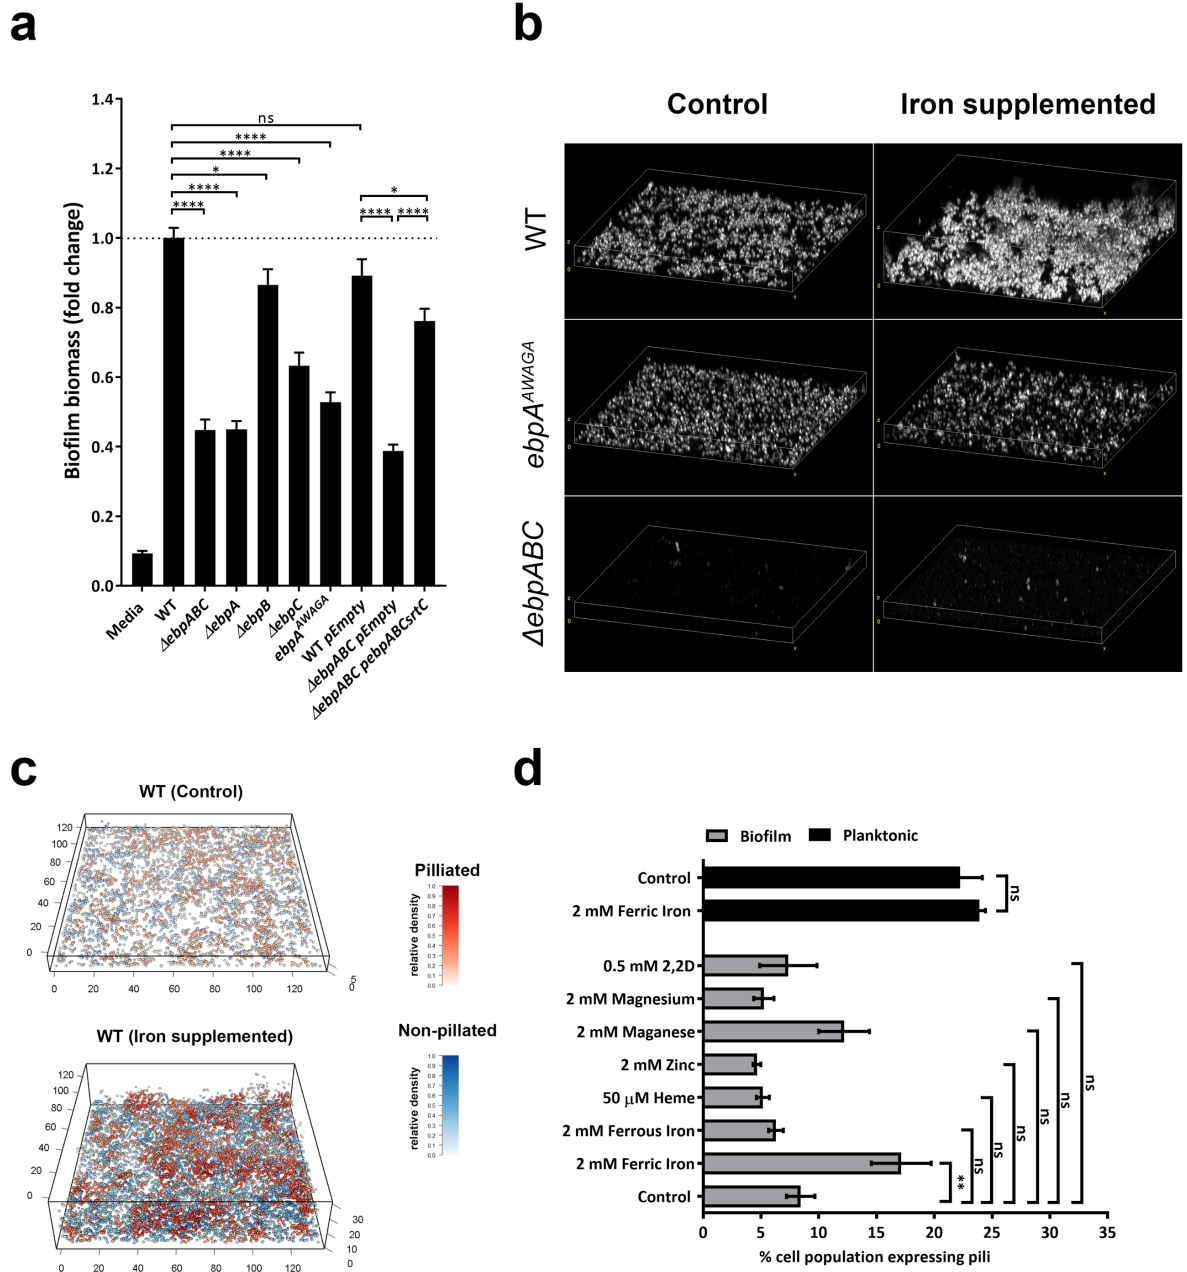

833

834 **Figure 1. Contribution of pilus to iron mediated *E. faecalis* biofilm growth. (a) *E.***

835 *faecalis* biofilm biomass quantification grown for 120 hours using crystal violet staining.

836 N=9 repeated on non-consecutive days. (b) Volume viewer of CSLM images of *E. faecalis*

837 biofilm at 24 hr for control (40% TSBG) and iron-supplemented (40% TSBG, 0.2 mM FeCl<sub>3</sub>)

838 at 63x magnification. *E. faecalis* cells are labeled with antibody against Group D antigen. (c)

839 Overlap of cell aggregation density map with the piliated cell population density map using

840 3D reconstruction of CLSM z-stack images of iron-supplemented *E. faecalis* biofilm

841 compared with control. N=3, repeated on non-consecutive days. **(d)** Quantification of  
842 immuno-fluorescent labelled anti-EbpC *E. faecalis* cells from 6-well microtiter plate 24 hour  
843 biofilm or planktonic culture grown at 37 °C in control and metal supplemented media. N>3.  
844 Statistical significance was determined by two-way ANOVA. Error bars represent standard  
845 error of the mean (SEM).

846

847

848

849

850

851

852

853

854

855

856

857

858

859

860

861

862

863

864

865



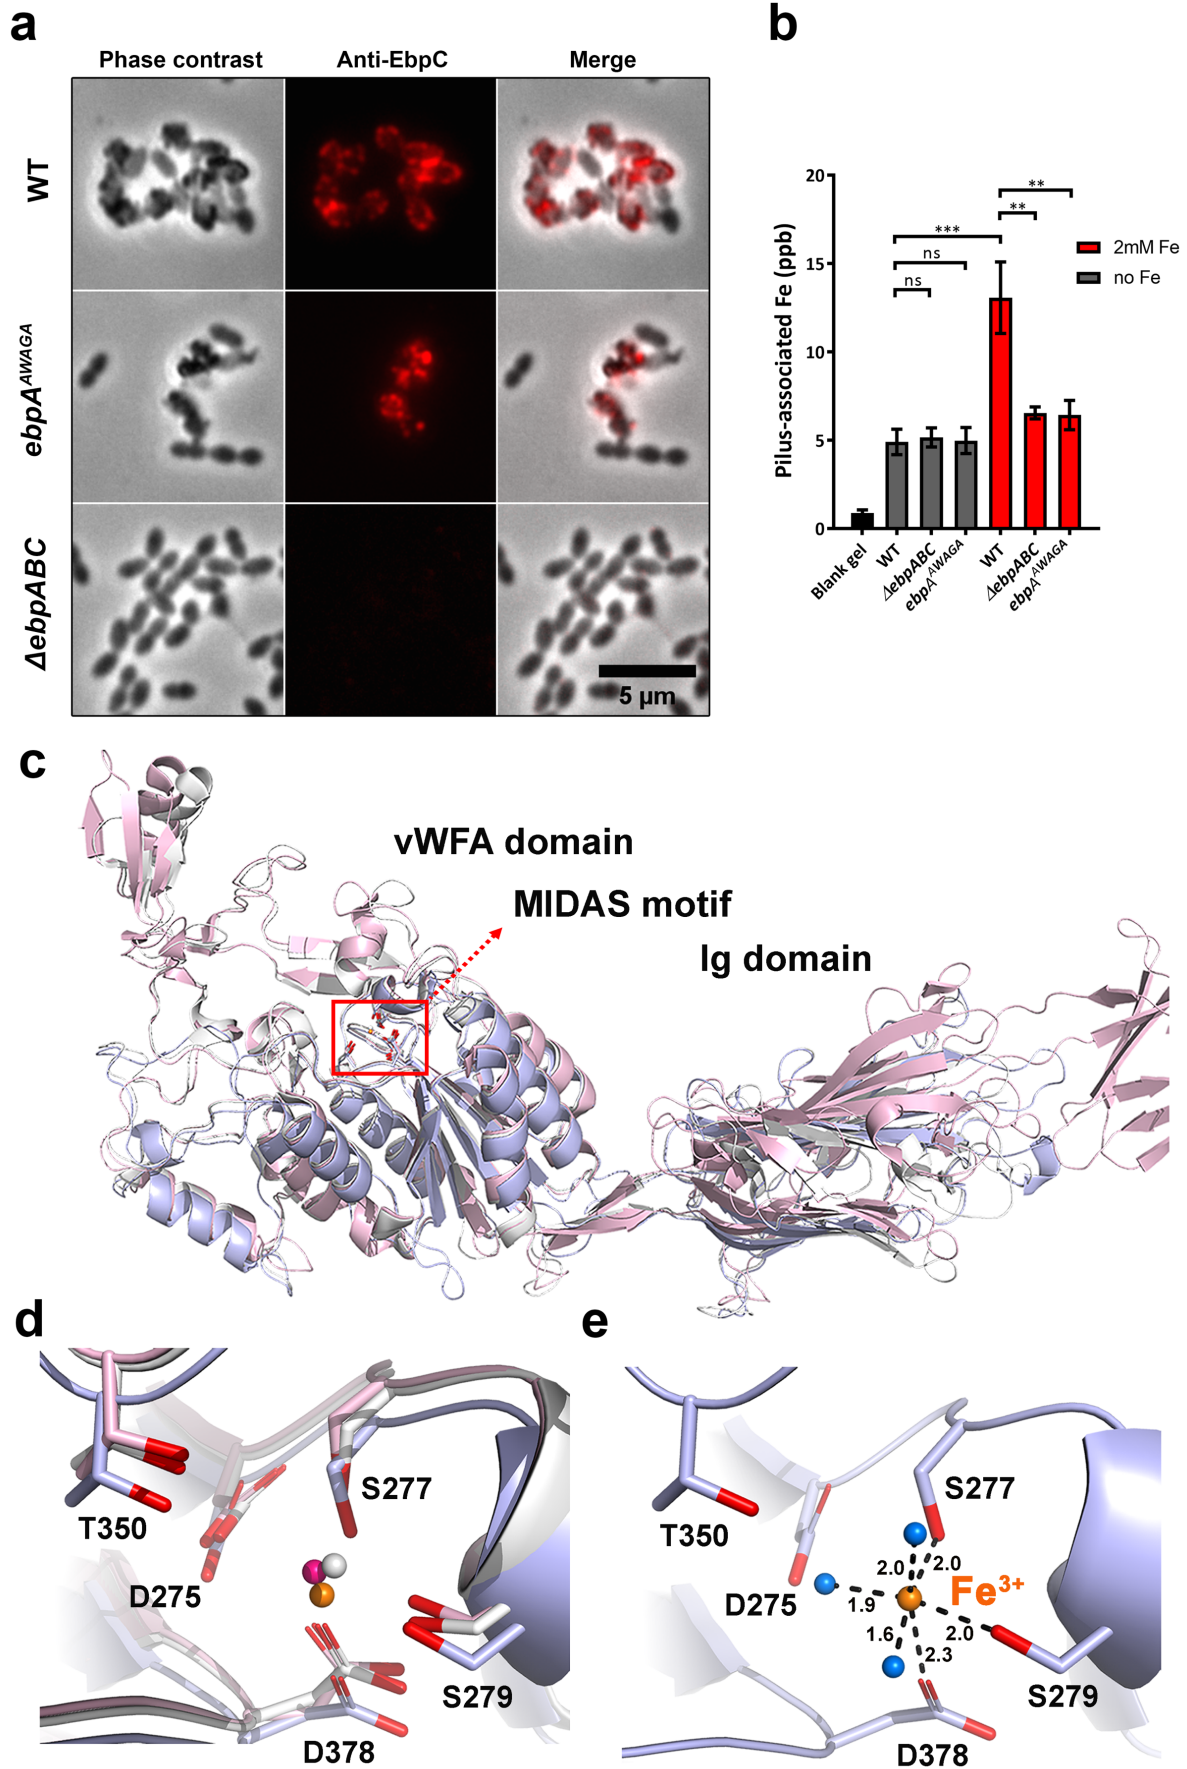

867 **Figure 2. Evidences for EbpA-iron interaction.** (a) Representative immunofluorescent  
868 images from 24 hour *E. faecalis* biofilm (wild type,  $\Delta ebpABC$  and *ebpA*<sup>AWAGA</sup>) labeled with  
869 EbpC antibody-conjugated fluorescent probe, grown from 6-well microtiter plate biofilm in  
870 the presence of iron, N=3. (b) ICP-MS analysis of iron (ppb) from pilus preps isolated under  
871 native condition. N=6. Statistical analysis is performed using two-way ANOVA Fisher LSD  
872 test. Error bars represent SEM. Black bar indicates 500nm. (c) Superimposition of EbpA  
873 structural model (N177-P620) (blue) with that of the *S. agalactiae* GBS104 (grey) and *S.*  
874 *pneumoniae* RrgA (pink). In agreement with other pilin adhesins, EbpA tip folds into a  
875 vWFA domain comprising of a 5 stranded  $\beta$ -sheet surrounded by 7  $\alpha$ -helices. The MIDAS  
876 motif is located at the N-terminus of the  $\beta$ -sheet. Only a partial model was obtained for the 2  
877 extended arms of this domain. The EbpA tip is then followed by an IgG fold domain. (d)  
878 Closeup view of the superimposition of the MIDAS motif from EbpA (blue), GBS104 (grey)  
879 and RrgA (pink) showing conservation of D275, S277, S279, T350 and D378 residues (EbpA  
880 numbering). Bound  $Mg^{2+}$  ions (grey/magenta) in GBS104 and RrgA and modelled  
881  $Fe^{3+}$  (orange) in EbpA are shown as spheres. (e) The  $Fe^{3+}$  is coordinated by the EbpA MIDAS  
882 motif by  $\sim 2\text{\AA}$  direct interactions with S277, S279, D378 and a water mediated interaction  
883 with D275 along with interactions with two additional water molecules (water molecules  
884 shown as blue spheres). Upon a closed to open conformational change, bonding could shift  
885 from D378 to T350.

886

887

888

889

890

891

**a**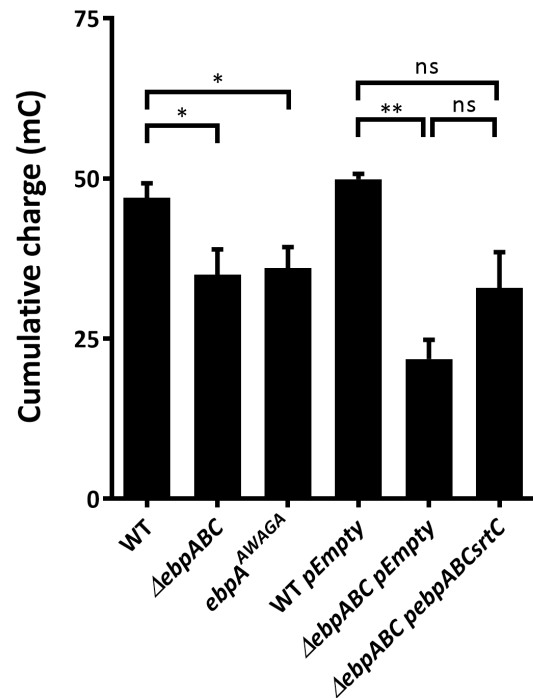**b**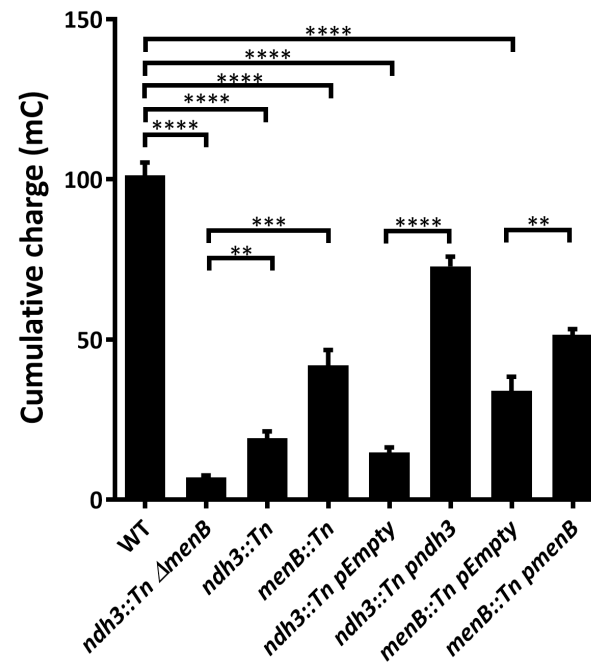

892

893 **Figure 3. Extracellular electron transfer in *E. faecalis* biofilm.** (a) Cumulative charge production (over 20 hours) in *E. faecalis* pilin mutants  
 894 grown in the presence of 0.5 mM iron and (b) EET-associated mutants grown in the presence of 2 mM iron on a screen-printed carbon mini-  
 895 electrode for 20 hours in a closed static system at 37°C. Experiments were repeated on non-consecutive days, N>3. Statistical analysis is  
 896 performed using one-way ANOVA with Bonferroni multiple comparison test. Error bar represents standard error margin (SEM).

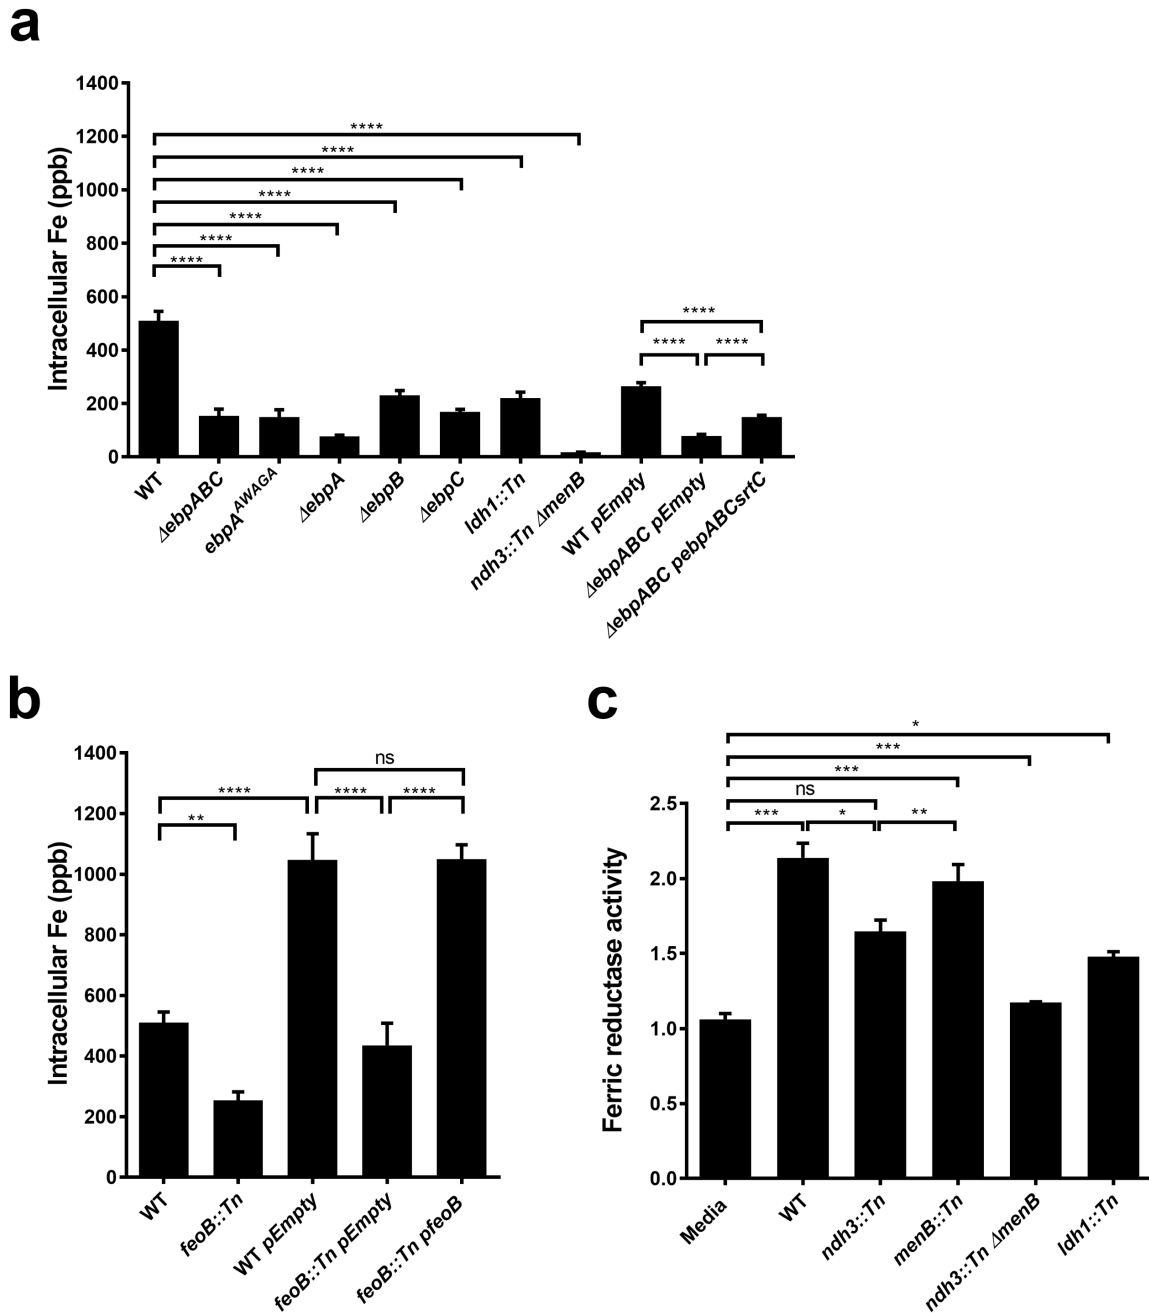

897

898 **Figure 4: Intracellular iron accumulation is dependent on the ability for extracellular**

899 **ferric iron reduction. (a-b)** ICP-MS analysis of intracellular iron (ppb) in *E. faecalis* biofilm

900 cells grown in iron-supplemented media. N=9. **(c)** Quantification of ferric iron reduction

901 activity by *E. faecalis*. Statistical significance was determined by one-way ANOVA. Error

902 bars represent standard error margin (SEM).

903

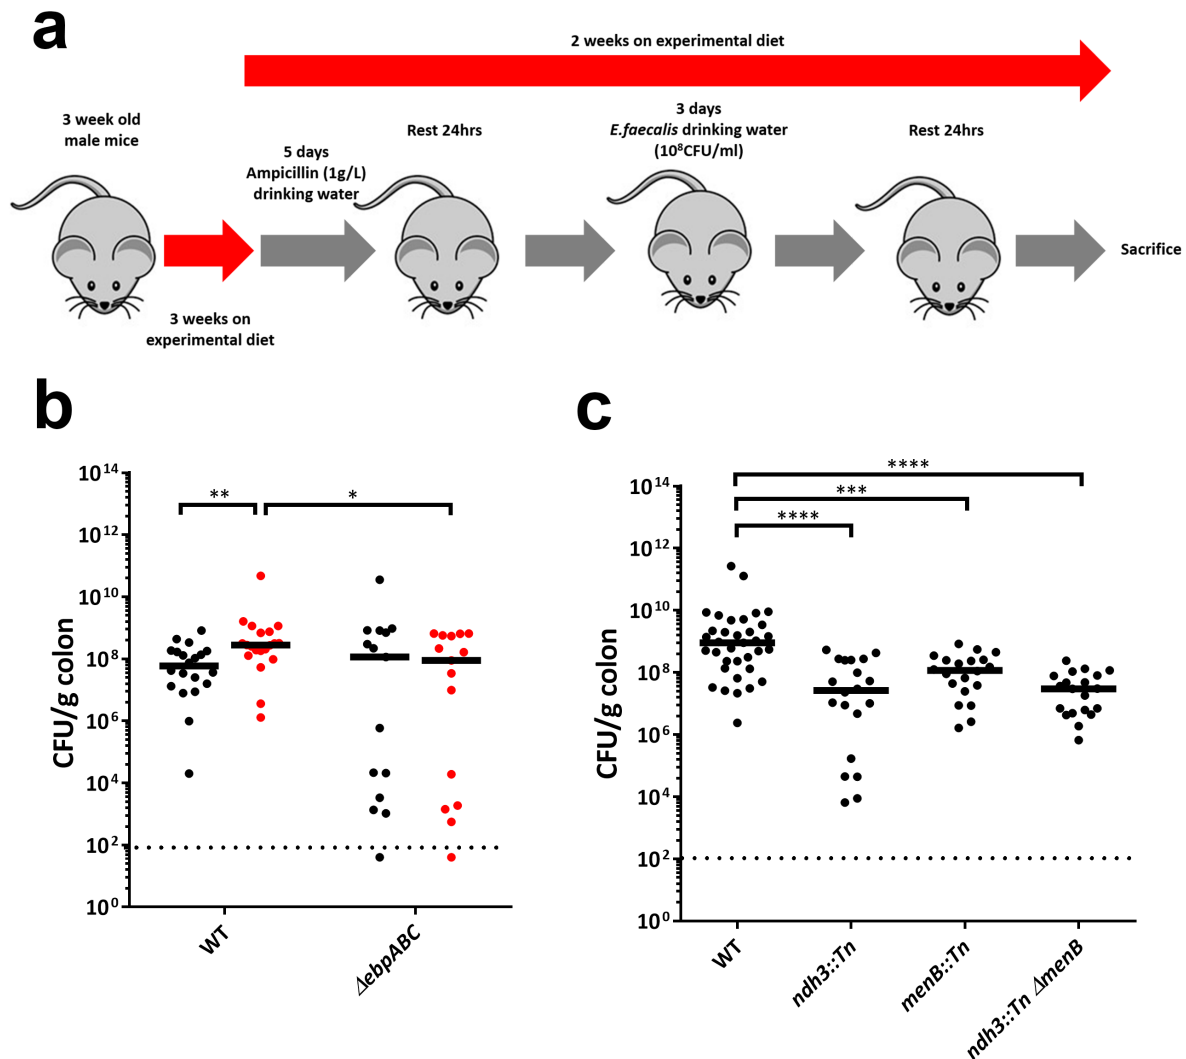

904

905 **Figure 5. *E. faecalis* colonization in lower gastrointestinal tract. (a)** Schematic of diet  
906 manipulation in GI colonization model. **(b)** Bacterial titers of pilus null mutant (N=3, n=5)  
907 and EET-associated mutants (for WT n=30, for mutants n=15) recovered from mouse colons,  
908 repeated on non-consecutive days. Statistical significance was determined by Mann-Whitney  
909 test. Black line indicates the median. Dotted line indicates limitation of detection at CFU <40.

910

911

912

913

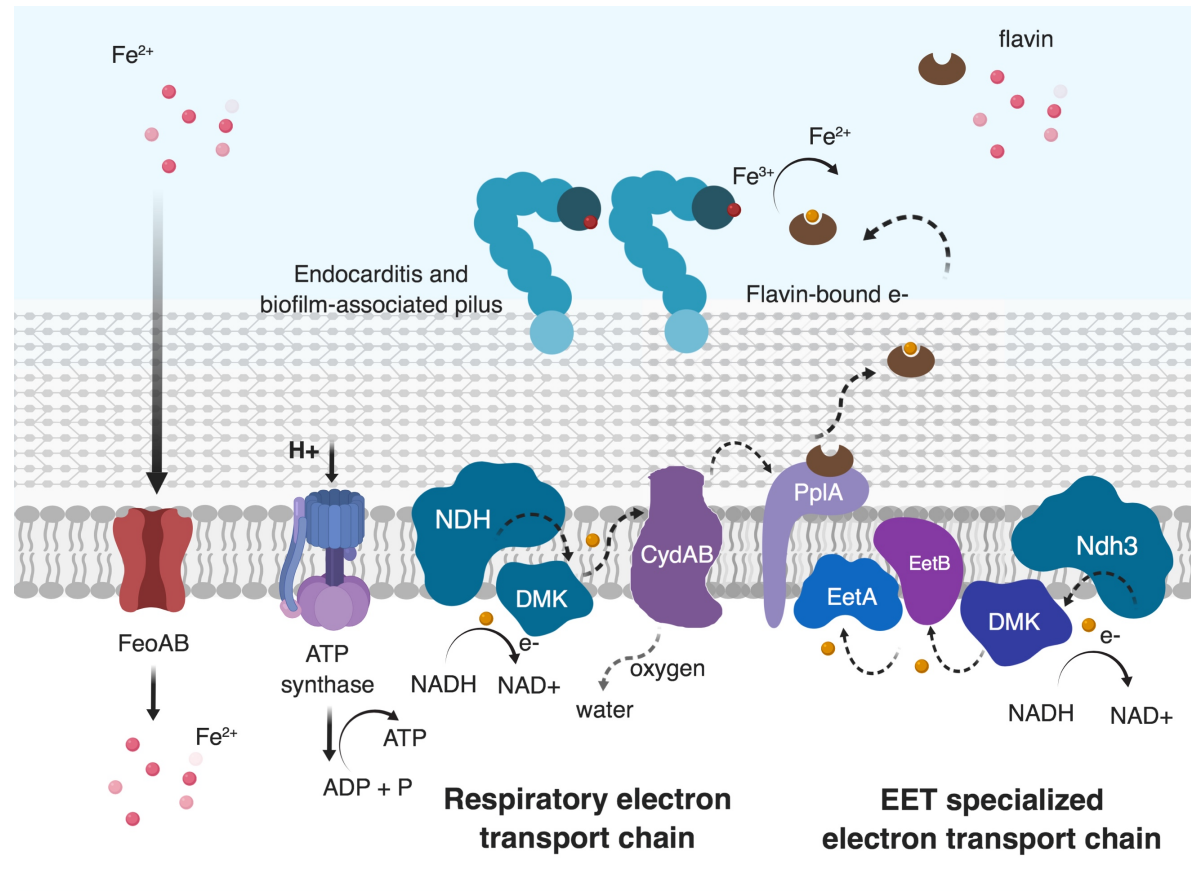

914

915 **Figure 6. Model for the role of iron in *E. faecalis* biofilm.** Biofilm growth in excess iron induces expression of the sortase-  
 916 assembled Ebp, which in turn associate with iron via the MIDAS motif of the EbpA tip adhesin. EET is dependent on both DMK in the electron  
 917 transport chain, as well as a specialized flavin-associated respiratory chain, leading to reduction of extracellular iron and FeoB-mediated uptake  
 918 of reduced free ferrous iron.

**a**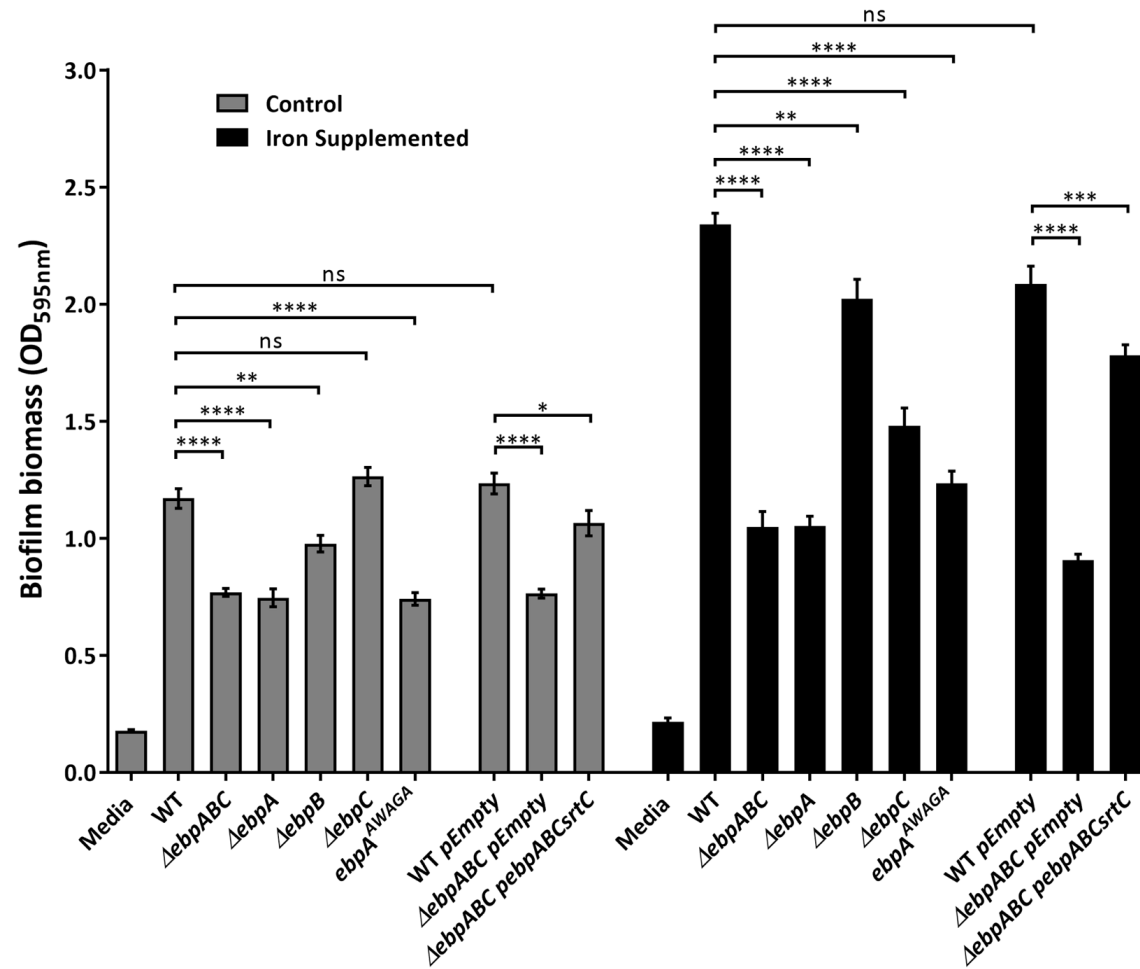**b**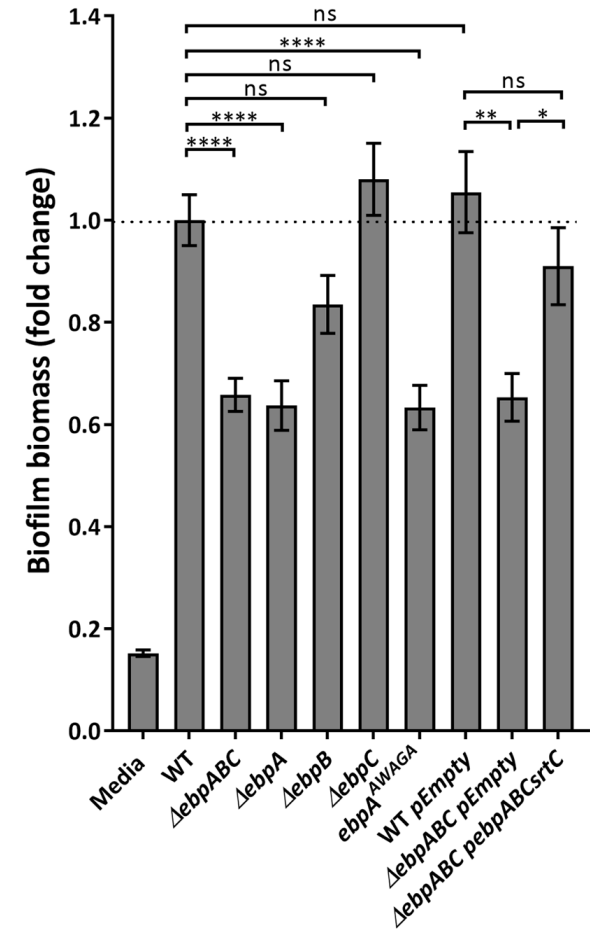

919

920 **Figure S1. Pili contribution to biofilm formation.** (a) *E. faecalis* biofilm total biomass quantification and (b) fold change calculations for the

921 same data shown in Fig 1A and Fig S1A after growth for 120 hours grown in non-supplemented and iron-supplemented media in 96-well

922 microtiter plate as measured by crystal violet staining. N=9 repeated on non-consecutive days. Statistical significance was determined by two-  
923 way ANOVA. Error bars represent the standard error of the mean (SEM).

924

925

926

927

928

929

930

931

932

933

934

935

936

937

938



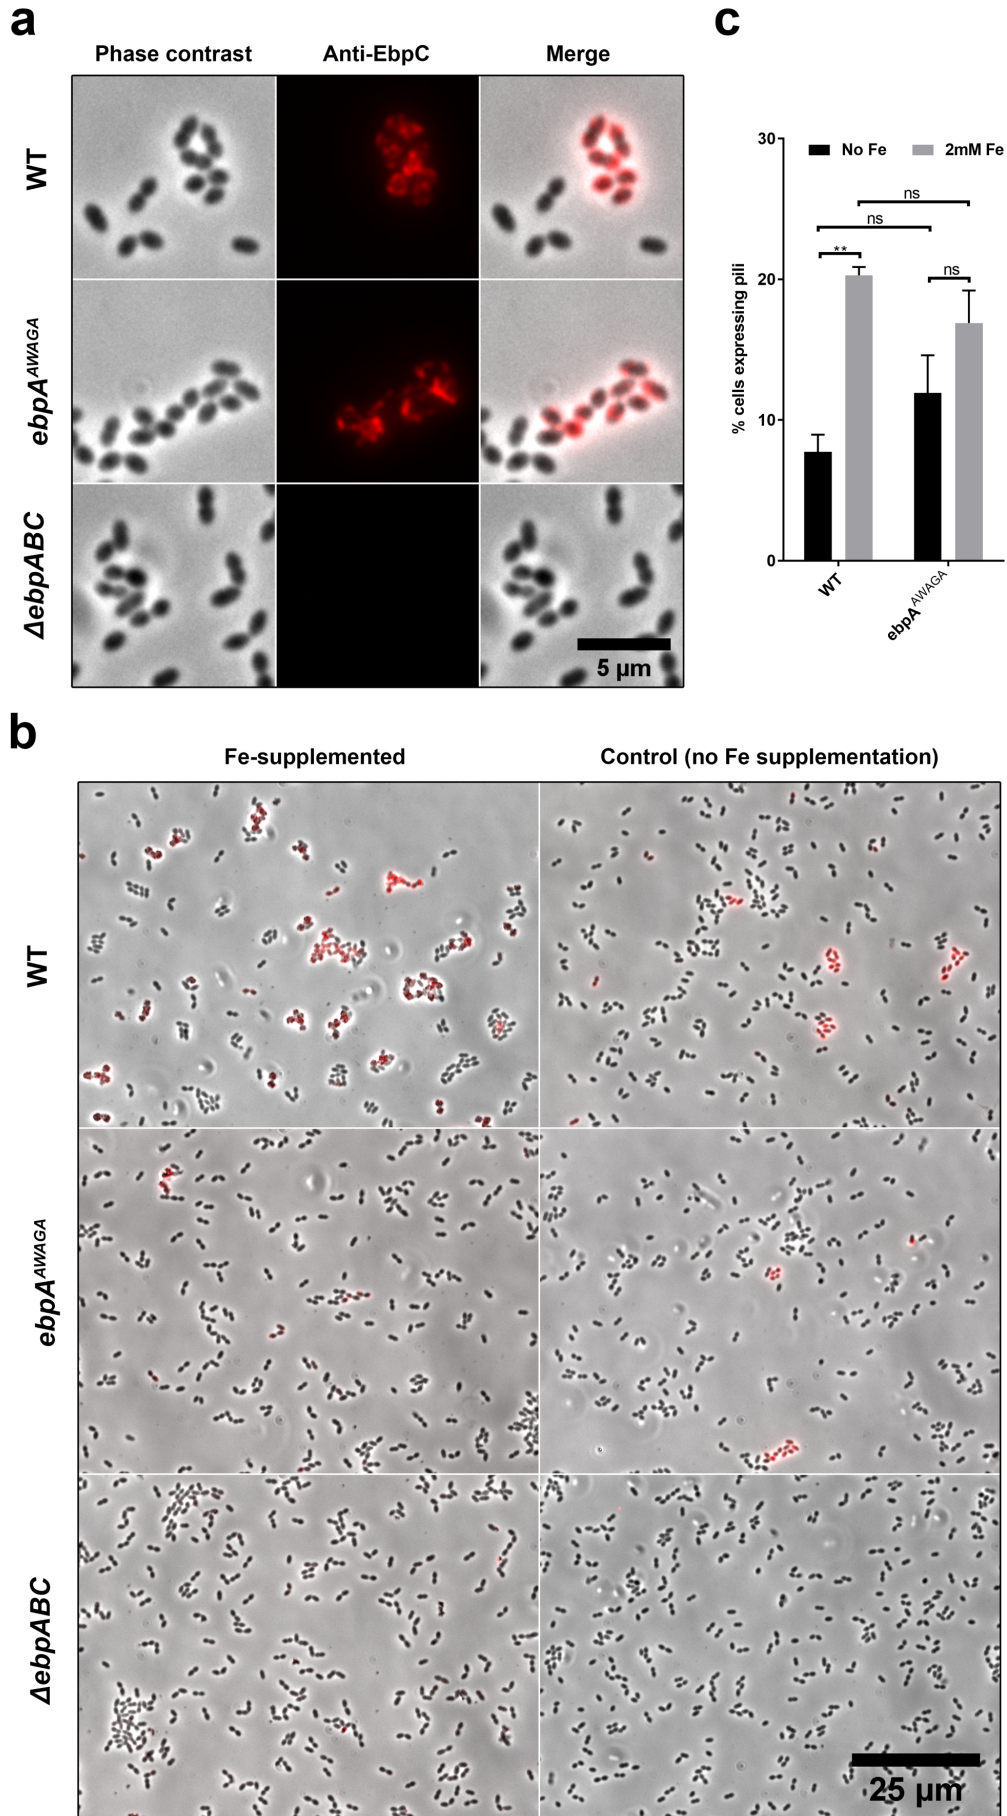

940 **Figure S2. Antibody specificity against cell surface expressed pili.** Representative  
941 immunofluorescent images of *E. faecalis* and pilus mutants **(a)** cropped and **(b)** at original  
942 63x magnification from biofilm grown in 6-well microtiter plates for 24 hours at 37 degrees  
943 in non-supplemented media or both non-supplemented and iron-supplemented media. N=6,  
944 with 5 images per biological replicate, capturing approximately 100-300 cells per images,  
945 repeated on non-consecutive days. **(c)** Quantification of immuno-fluorescent labelled anti-  
946 EbpC *E. faecalis* cells from 6-well microtiter plate 24hr biofilm grown at 37 degrees in  
947 control and metal supplemented media. Statistical significance was determined by two-way  
948 ANOVA with Bonferroni multiple comparison test. Error bars represent the standard error of  
949 the mean (SEM).

950

951

952

953

954

955

956

957

958

959

960

961

962

963

964

965

|     |        |                                                                         |     |
|-----|--------|-------------------------------------------------------------------------|-----|
| 966 |        |                                                                         |     |
| 967 | EbpA   | MITDENDKTNINIELNLLNQTEQPLQREIQLKNAQFMDTAVIEKDGYSYQVTNGTLYLTL            | 60  |
| 968 | GBS104 | -----MKKRQKIWRGLSVTLLILSQI---P--FGI                                     | 25  |
| 969 | RrgA   | -----MLNRETHMKVKRKIFQKAVAGLCCISQL---TAFSSI                              | 34  |
| 970 |        | :*: : :                                          *:                     |     |
| 971 |        |                                                                         |     |
| 972 | EbpA   | DAQVK----KPVQLSLAVEQSSSLQTAQPPKLLYE--NNEYDVSVTSEKITVEDS---AKES          | 112 |
| 973 | GBS104 | LVQGETQDTNQALGKIVKKTGDNATPLGKATFVLKNDNDKSETSHE--TVEGSGEATFEN            | 84  |
| 974 | RrgA   | VALAETPETSPAIGKVVIKETGEGGALLGDAVFEKNNNDGTTVSQR--TEAQTGEAIFSN            | 93  |
| 975 |        | . : . . .: : : : . : : * : * : * . . * : . .                            |     |
| 976 |        |                                                                         |     |
| 977 | EbpA   | TEPEKITVPENTK-----ETNKNDSAPEKTEQPTATEEVNPF AEARMAPATLRANLALP            | 167 |
| 978 | GBS104 | IKPGDYTLREETAPIGYKKTDKTKWKVKVADNGATII EGMADKAE-----KRKE                 | 133 |
| 979 | RrgA   | IKPGTYTLTEAQP PVGYKPKSTKQWTVEVEKNGRRTTVQGE---QVE-----NREE               | 139 |
| 980 |        | : * * : * : * . . : * : . *                                             |     |
| 981 |        |                                                                         |     |
| 982 | EbpA   | LIAPQYTTDMSGTYPTANWQPTGNQNVLNHQGNKDGGAQWDGQTSWNGDPTNRTNSYTEY            | 227 |
| 983 | GBS104 | VLNAQYP--KSAIYEDTK----ENYPLVNVEGSKVG-EQYKALNPINGKDGREIAE---             | 183 |
| 984 | RrgA   | ALSDQYP--QTGTYPDVQ----TPYQIIKVDGSEKN-GQHKALNPN---PYERVIPE---            | 186 |
| 985 |        | : ** : : * . : : : * : . * . . . *                                      |     |
| 986 |        |                                                                         |     |
| 987 | EbpA   | GGTGDQADYAIRKYARETTTPGLFDVYLVNRGNV----QKEITPLDLVLVVD <b>DNS</b> SGSMNEN | 283 |
| 988 | GBS104 | -G-----WLSKKITGVNDLTKNKYKIELTVEGKTTVETKELNQPLDVVLL <b>DNS</b> SMNNE     | 237 |
| 989 | RrgA   | -G-----TLSKRIYQVNNLDDNQYGIELTVSGKTVYEQKDKSVPLDVVILL <b>DNS</b> SMSNI    | 240 |
| 990 |        | * : : : . : : * . * : . : . * * : : * * . . :                           |     |
| 991 |        |                                                                         |     |
| 992 | EbpA   | NRIG-----EVQKGVNRFVDTLADSGITNNINMGYVGYSSDGYN-----                       | 322 |
| 993 | GBS104 | RANNSQRALKAGEAVEKLIKITSNKD---NRVALVTYASTIFDGTEATVSKGVADQNGK             | 294 |
| 994 | RrgA   | RNKNARRAERAGEATRSLIDKITSNSE---NRVALVTYASTIFDGTEFTVEKGVADKNGK            | 297 |
| 995 |        | . . . . . : * : : . . . * * : * : :                                     |     |
| 996 |        |                                                                         |     |
| 997 | EbpA   | -----NNAIQM-----GPFDTVKN-----PIKNITPSSTRGG <b>T</b>                     | 350 |

|      |        |                                                                |     |
|------|--------|----------------------------------------------------------------|-----|
| 998  | GBS104 | ALNDSVSWDYHKTTFTATTHNYSYLNLTNDANEVNI LKSRI PKAEHINGDRTLYQFGA   | 354 |
| 999  | RrgA   | RLNDSLFWNYDQTSFTTNTKDYSYLKLTNDKNDIVELKKNKVPTEAEDHDGNRLMYQFGA   | 357 |
| 1000 |        | . : : . . : * . . . * . *                                      |     |
| 1001 |        |                                                                |     |
| 1002 | EbpA   | FTQKALRDAGDMLATP--NGHKKVIVLLTDGVPTFSYKVS RVQTEADGRFYGTQFTNRQD  | 408 |
| 1003 | GBS104 | FTQKALMKANEILETQSSNARKKLI FHVTDGVPTMSYAINFNPY-ISTS-YQNQFN----  | 408 |
| 1004 | RrgA   | FTQKALMKADEILTQQARQNSQKVI FHITDGVPTMSYPINFNHATFAPS-YQNQLN----  | 412 |
| 1005 |        | ***** . * . : : * : : * : : * : : * : : * : : * : : *          |     |
| 1006 |        |                                                                |     |
| 1007 | EbpA   | QPGSTSYISGSYNAPDQNNISKRINSTFIATI--GEAMALKQRGIEIHGLGIQLQSDPRA   | 466 |
| 1008 | GBS104 | -----SFLN---KIPDRSGI---LQEDFIING--DDYQIVKGD-----GESFKLFSD---   | 447 |
| 1009 | RrgA   | -----AFFS---KSPNKDGI---LLSDFITQATSGEHTIVRGD-----GQSYQMFTD---   | 453 |
| 1010 |        | : : : . : * : : . * : : . * * . : : : * . : : : *              |     |
| 1011 |        |                                                                |     |
| 1012 | EbpA   | NLSKQQVEDKMRMVSADENGDLYESADYAPDISDYLAKKAVQISGTVVNGKVVDPIAE     | 526 |
| 1013 | GBS104 | -----RKVPVTGG-----TTQA                                         | 459 |
| 1014 | RrgA   | -----KTVYEKGA-----P--A                                         | 463 |
| 1015 |        | : * . *                                                        |     |
| 1016 |        |                                                                |     |
| 1017 | EbpA   | PFKYEPNTLSMKSVGPVQVQTLPEVSLTGATINSNEIYLGKGQEIQIHYQVRIQT-----   | 581 |
| 1018 | GBS104 | AYRVPQNQLSVMS-----NEGY-----AINSGYIYLYWRDYN-WVYFPDPKTKKVSA      | 505 |
| 1019 | RrgA   | AFPVKPEKYSEMK-----AAGYAVIGDPINGGYIWLNWRESI-LAYPFNSNTA----      | 510 |
| 1020 |        | : : * . * * . * : * . : *                                      |     |
| 1021 |        |                                                                |     |
| 1022 | EbpA   | ---ESENFKPDFWYQMNGRRTTFQPLATAPEKVDGVPSPGKAPGVKLVKVIWEEYDQDPT   | 638 |
| 1023 | GBS104 | TKQIKTHGEPTTLYFNGN-I--RPKGYDI--FTVGIGVNGDPGATPLE---AEKFMQISIS  | 557 |
| 1024 | RrgA   | --KITNHGDPTRWYNGN-I--APDGYDV--FTVGIGINGDPGTDEAT---ATSFMQISIS   | 560 |
| 1025 |        | . : * * . . * . . . * : . * * . . : * . :                      |     |
| 1026 |        |                                                                |     |
| 1027 | EbpA   | SRPDNVIYEISRKQVTD TANWQTGYIKLSKPENDTNSNSWERKNVTQLSKTAEESYQEVLG | 698 |
| 1028 | GBS104 | SKTEN-----YTNVDDTNKIYDELNKY----FKTIVE                          | 585 |
| 1029 | RrgA   | SKPEN-----YTNVTDTTKILEQLNRY----FHTIVT                          | 588 |

|      |        |                             |                              |                           |                |                 |         |
|------|--------|-----------------------------|------------------------------|---------------------------|----------------|-----------------|---------|
| 1030 |        | *: :*                       |                              | *.                        | *              | :*.:            | :: ::   |
| 1031 |        |                             |                              |                           |                |                 |         |
| 1032 | EbpA   | LPQYNNQGQAFNYQTRELAVPGYS--- | QEKIDDTTWKNTKQFKPLDLKVIKNSSS | GEKN                      |                |                 | 755     |
| 1033 | GBS104 | -----                       | EKHSIVDGNVTDPMGEMIEFQLKNGQS  | FTHDDYVLVGNDGSQLKN        |                |                 | 630     |
| 1034 | RrgA   | -----                       | EKXSIENGTITDPMGELIDLQLGTDGR  | FDPADYTLTANDGSRLN         |                |                 | 633     |
| 1035 |        |                             | :.                           | *                         | :: :           | . * * :         | *..* :* |
| 1036 |        |                             |                              |                           |                |                 |         |
| 1037 | EbpA   | LVGAVFELSGKNVQTTLVDNKDGSYSL | PKDVRLQKGERYTLTEVKAPAGHEL    | GKKTWQI                   |                |                 | 815     |
| 1038 | GBS104 | GV----                      | ALGGPNSDGGILKDVTVTYD-----    |                           |                |                 | 652     |
| 1039 | RrgA   | GQ----                      | AVGGPQNDGGLLKNKAVLYD-----    |                           |                |                 | 655     |
| 1040 |        |                             | :.*                          | :                         | :::            | *.              |         |
| 1041 |        |                             |                              |                           |                |                 |         |
| 1042 | EbpA   | EVNEQGKVSIDGQEVTTNQVIPLEIEN | KFSSLPPIRIRKYTMQNGKQVNLAE    | ATFALQRK                  |                |                 | 875     |
| 1043 | GBS104 | -----                       | KTSQTIKINHLNLGSGQKVLTLY---   | DVRLK                     |                |                 | 680     |
| 1044 | RrgA   | -----                       | TTEKRIRVTGLYLGTDEKVTLTLY---  | NVRLN                     |                |                 | 683     |
| 1045 |        |                             | :. *                         | :: :                      | : . . . . *    | *: :: :         |         |
| 1046 |        |                             |                              |                           |                |                 |         |
| 1047 | EbpA   | NA---QGSYQTVATQKTDTAGLSYFKI | SEPGEYRMVEQSGPLGYDTLAGNYE    | FTVDKYGE                  |                |                 | 932     |
| 1048 | GBS104 | DNYISNKFYNTNNR-----         | TTLSPKSEKEPNTI-----          | RDFPIPKIR-                |                |                 | 717     |
| 1049 | RrgA   | DEFVSNKFYDTNGR-----         | TTLHPKE-VEQNTV-----          | RDFPIPKIR-                |                |                 | 719     |
| 1050 |        | :                           | :                            | *:*                       | :              | * . * .         | :* : *  |
| 1051 |        |                             |                              |                           |                |                 |         |
| 1052 | EbpA   | IHYAGKNIENAPEWTLTHQNHLKPF   | DLTVHKKADNQTPKGAKFRLTGPD     | TDIEL----                 |                |                 | 988     |
| 1053 | GBS104 | -----                       | DVREFPVLTI SNQKKMGEVEFIKVN   | KDKHSESLLGAKFQLQIEK-DF--- | SGY            |                 | 766     |
| 1054 | RrgA   | -----                       | DVRKYPEITISKEKKLGDIEFIKVN    | KNDK-KPLRGAVFSLQKQHPDY    | PDIYGA         |                 | 771     |
| 1055 |        |                             | :. *                         | *::: : : :                | ..:            | :* .: * * * * * | . *     |
| 1056 |        |                             |                              |                           |                |                 |         |
| 1057 | EbpA   | -----                       | PKDGKETDTFVFENLKP            | GKYVLTETFTPEGYQGLKEPIE-LI | IREDGSVTID     |                 | 1039    |
| 1058 | GBS104 | KQFVPEGS                    | DVTTKNDGKIYFKALQDGN          | KLYEISSPDGYIEVKTKPVV      | TFTIQNGEVTNL   |                 | 826     |
| 1059 | RrgA   | IDQNGTYQNV                  | RTGEDGKLTFFKNLSDGKY          | RLFENSEPAGYKPVQNKPI       | IVAFQIVNGEVRDV |                 | 831     |
| 1060 |        |                             | : . . :                      | *: * . * * * *            | * ** :         | : : *.*         |         |
| 1061 |        |                             |                              |                           |                |                 |         |

```
1062 EbpA      GEKV-AD---VLISGEKNNQITLDVTNQAQVPLPETGGIGRLWFYLIAISTFVIAGVYL 1094
1063 GBS104    KADPNANKNQIGYLEGNG-KHLITNTPKRPPGVFPKTGGIGTIVYILVGSTFM-ILTICS 884
1064 RrgA      TSIV-PQDIPAGYEFTND-KHYITNEPIPPKREYPRRTGGIGMLPFYLLIGCMMM-GGVLLY 888
1065          :           :  ::  :           *.***** : : *:. : :
1066
1067 EbpA      FIRRPEGSV      1103
1068 GBS104    FRRKQL---      890
1069 RrgA      TRKHP-----      893
1070          ::
1071
```

1072 **Figure S3. Clustal alignment of EbpA homologs**

1073 Alignment of the EbpA sequence with *S. agalactiae* GBS104 (Q8E0S5) and *S. pneumoniae* RrgA  
1074 (AOA0H2UNT6), showing conservation of the EbpA MIDAS motif and associated metal binding  
1075 residues.

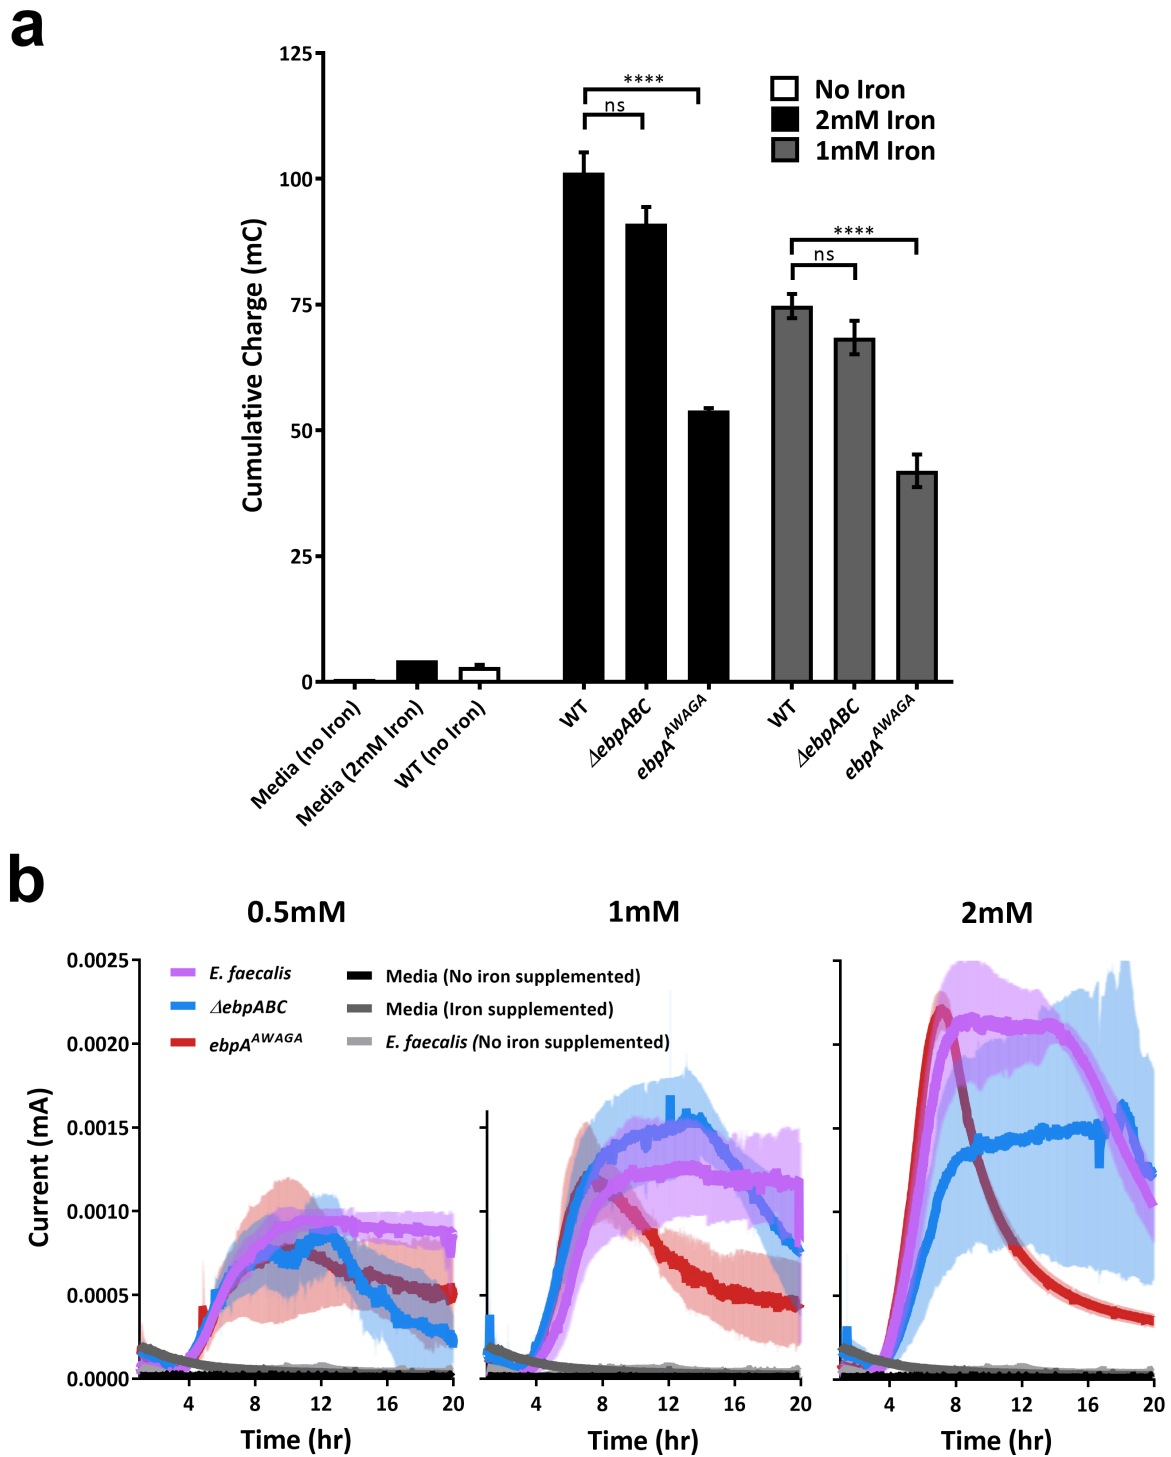

1076

1077 **Figure S4. Current output and cumulative charge production of pilin mutants in a**  
 1078 **dosage dependent manner. (a)** Cumulative charge production over 20 hours and **(b)** current  
 1079 output in *E. faecalis* mutants grown on a screen-printed carbon mini-electrode over 20 hr in  
 1080 closed static system at 37°C at 0.5 mM, 1 mM and 2 mM iron concentrations. Statistical

1081 analysis is performed using one-way ANOVA with Bonferroni multiple comparison test,

1082  $N > 3$ . Error bars represent the standard error of the mean (SEM).

1083

1084

1085

1086

1087

1088

1089

1090

1091

1092

1093

1094

1095

1096

1097

1098

1099

1100

1101

1102

1103

1104

1105



**a**

**Flavin-mediated electron transfer gene locus**

*Listeria monocytogenes*

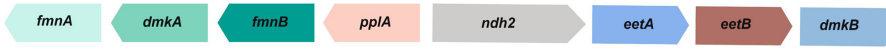

*Enterococcus faecalis*

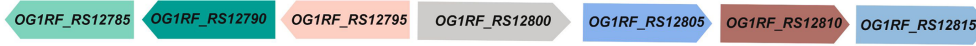

**Menaquinone biosynthesis genes**

*Enterococcus faecalis*

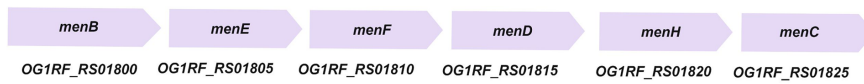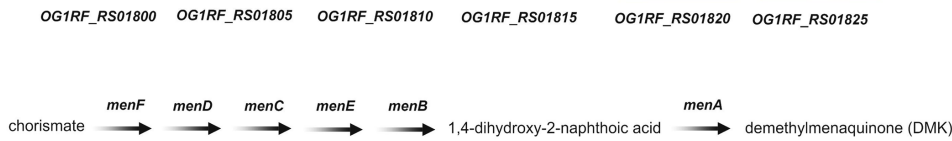

**b**

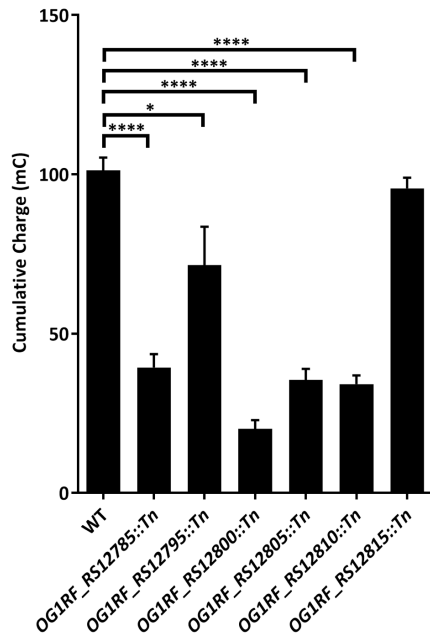

**c**

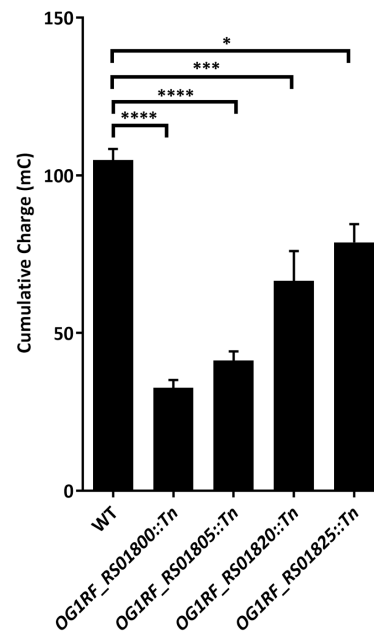

1106

1107 **Figure S5. Respiratory electron transport mechanisms in *E. faecalis*.** (a) Gene homologs

1108 of EET specialized respiratory electron transport chain and menaquinone biosynthesis genes

1109 required for DMK. (b) Cumulative charge production over 20 hours by *E. faecalis* mutants of

1110 EET specialized gene locus and menaquinone biosynthesis genes grown on a screen-printed

1111 carbon mini-electrode over 20 hr in closed static system at 37°C at 2 mM iron concentration,

1112 N=3. Statistical analysis is performed using one-way ANOVA with Bonferroni multiple  
1113 comparison test. Error bars represent the standard error of the mean (SEM).

1114

1115

1116

1117

1118

1119

1120

1121

1122

1123

1124

1125

1126

1127

1128

1129

1130

1131

1132

1133

1134

1135

1136

1137

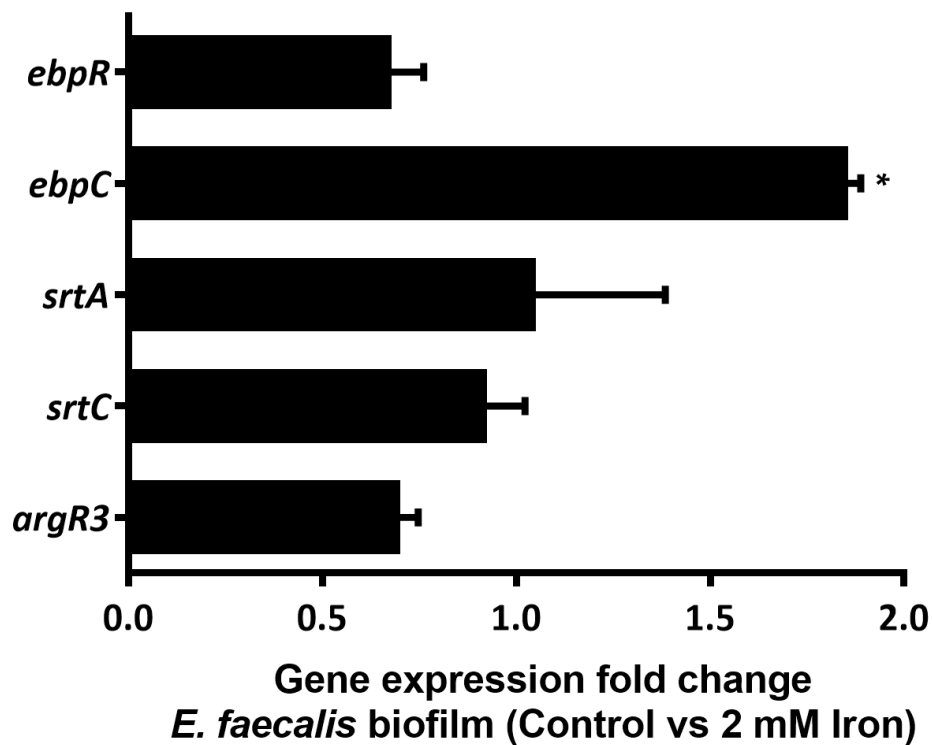

1138

1139 **Figure S6. Regulation of pilus-associated genes in response to iron.** qRT-PCR of RNA  
1140 transcript abundance of genes associated with pilus biogenesis. N=6, repeated on non-  
1141 consecutive days. N=9. Statistical significance was determined by one-way ANOVA. Error  
1142 bars represent the SEM.

1143

1144

1145

1146

1147

1148

1149

1150

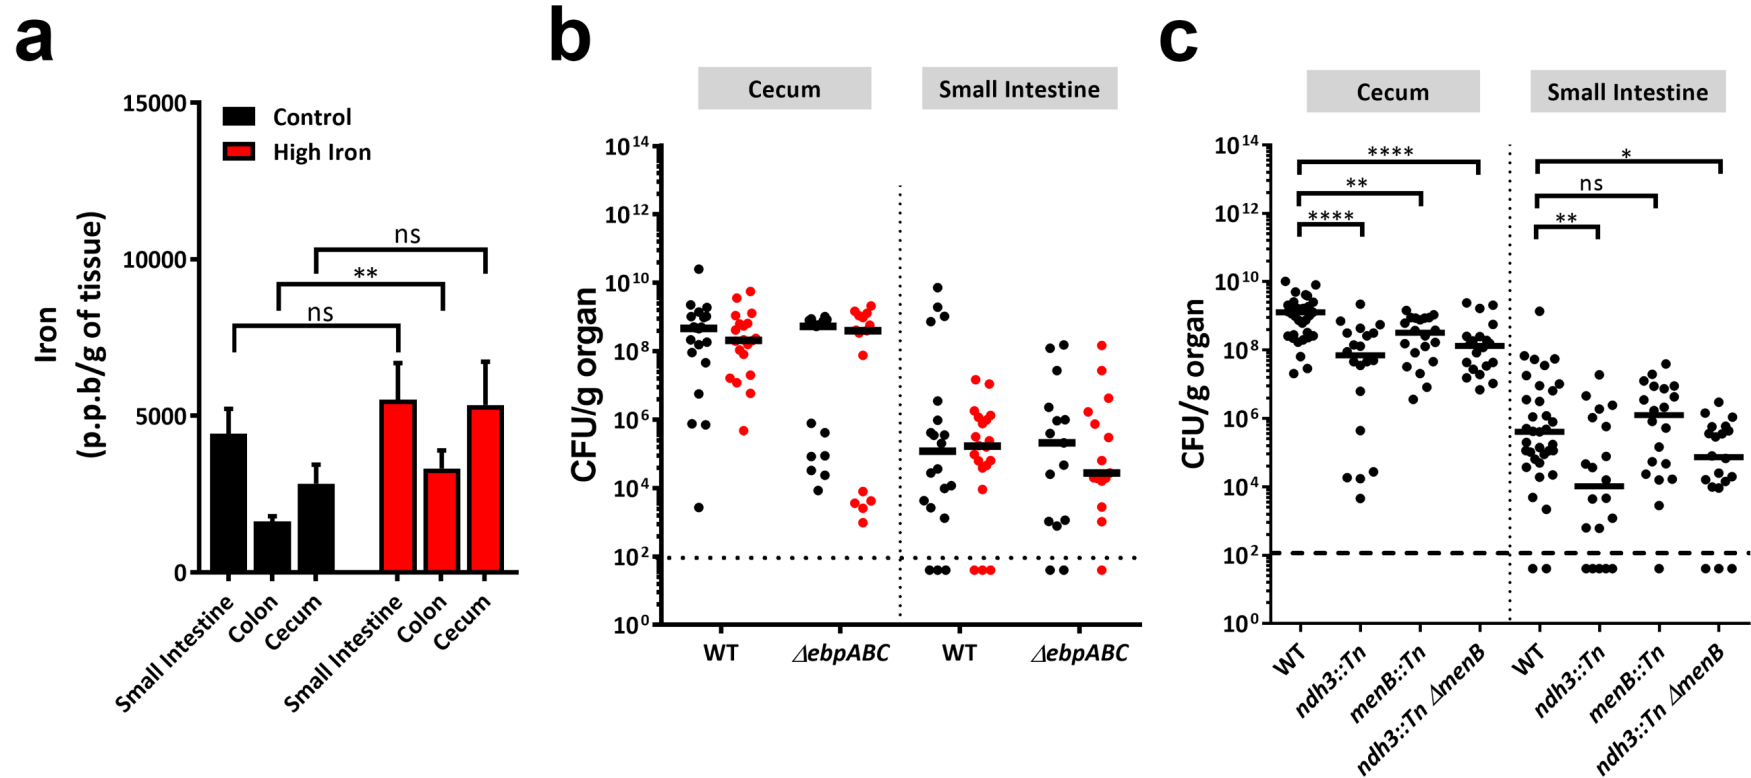

1152

1153 **Figure S7. *E. faecalis* pilin mutant colonization in mouse lower gastrointestinal tract. (a)** ICP-MS analysis of iron in the mouse tissues after  
 1154 feeding on normal or high iron diets, N=2, n=5. **(b)** Bacterial titers of pilin mutants recovered from the mouse cecum and small intestine, N=3,  
 1155 n=5. **(c)** Bacterial titers of EET associated mutants recovered from the mouse cecum and small intestine, N=3, n=5. Statistical significance was  
 1156 determined by Mann-Whitney test. Black line indicates median. Dotted line indicates limitation of detection of CFU <40.

**Supplementary Table 1. RNA-sequencing results.**

| Old Gene Locus | New Gene Locus | RF-Bio1   | RF-Bio2   | RF-Bio3   | RF_Fe-Bio1 | RF_Fe-Bio2 | RF_Fe-Bio3 | logFC   | logCPM  | P-Value | FDR    | Annotation                                                        |
|----------------|----------------|-----------|-----------|-----------|------------|------------|------------|---------|---------|---------|--------|-------------------------------------------------------------------|
| OG1RF_10072    | OG1RF_RS00365  | 8511.8527 | 6488.9180 | 7624.4051 | 2705.9691  | 2800.5727  | 3142.9526  | -1.3872 | 12.3487 | 0.0003  | 0.0140 | transcriptional regulator (stress response regulator Gls24)       |
| OG1RF_10073    | OG1RF_RS00370  | 3214.8225 | 2303.0033 | 4763.1714 | 1013.7927  | 1268.0472  | 1233.1796  | -1.5480 | 11.1690 | 0.0002  | 0.0111 | membrane protein (transglycosylase associated protein)            |
| OG1RF_10171    | OG1RF_RS00860  | 1352.7718 | 926.4525  | 639.5307  | 3502.8808  | 2184.6641  | 2369.1118  | 1.4632  | 10.8424 | 0.0007  | 0.0268 | preprotein translocase subunit SecY                               |
| OG1RF_10172    | OG1RF_RS00865  | 411.1365  | 292.5639  | 283.1256  | 1160.0613  | 713.7294   | 798.6700   | 1.4329  | 9.2682  | 0.0005  | 0.0212 | adenylate kinase                                                  |
| OG1RF_10269    | OG1RF_RS01485  | 79.5748   | 82.5180   | 73.2796   | 161.3998   | 173.9036   | 240.0148   | 1.2876  | 7.1469  | 0.0017  | 0.0468 | esterase                                                          |
| OG1RF_10296    | OG1RF_RS01630  | 10.6100   | 18.7541   | 19.9853   | 65.5687    | 68.8368    | 64.1419    | 2.0227  | 5.5802  | 0.0001  | 0.0046 | PTS mannitol transporter subunit IICB                             |
| OG1RF_10338    | OG1RF_RS01840  | 1249.3246 | 465.1016  | 886.0165  | 254.7091   | 396.7176   | 326.9167   | -1.4098 | 9.2303  | 0.0019  | 0.0500 | osmotically inducible protein C                                   |
| OG1RF_10340    | OG1RF_RS01850  | 29.1774   | 7.5016    | 13.3236   | 113.4843   | 54.3449    | 78.6255    | 2.2048  | 5.8090  | 0.0000  | 0.0036 | PTS sorbose transporter subunit IIC                               |
| OG1RF_10360    | OG1RF_RS01950  | 172.4121  | 97.5213   | 109.9193  | 393.4121   | 226.4370   | 380.7132   | 1.3840  | 7.8873  | 0.0014  | 0.0405 | ferrous iron transport protein B                                  |
| OG1RF_10396    | OG1RF_RS02135  | 1726.7735 | 1425.3115 | 1122.5096 | 522.0276   | 280.7819   | 403.4732   | -1.8269 | 9.8397  | 0.0000  | 0.0017 | hypothetical protein                                              |
| OG1RF_10541    | OG1RF_RS02845  | 198.9370  | 225.0492  | 369.7287  | 65.5687    | 94.1978    | 120.0074   | -1.4948 | 7.5083  | 0.0007  | 0.0268 | membrane protein (transglycosylase-associated protein)            |
| OG1RF_10544    | OG1RF_RS02860  | 140.5822  | 56.2623   | 99.9267   | 494.2870   | 278.9704   | 289.6731   | 1.8213  | 7.8679  | 0.0001  | 0.0057 | glucuronyl hydrolase                                              |
| OG1RF_10545    | OG1RF_RS02865  | 98.1423   | 30.0066   | 39.9707   | 310.1903   | 206.5105   | 192.4257   | 2.0373  | 7.2614  | 0.0000  | 0.0029 | beta-galactosidase                                                |
| OG1RF_10549    | OG1RF_RS02885  | 15.9150   | 0.0000    | 3.3309    | 83.2218    | 32.6069    | 37.2437    | 2.7733  | 5.1351  | 0.0001  | 0.0052 | PTS fructose transporter subunit IID                              |
| OG1RF_10551    | OG1RF_RS02895  | 100.7948  | 138.7803  | 376.3905  | 30.2625    | 83.3288    | 53.7964    | -1.8588 | 7.0590  | 0.0009  | 0.0315 | GTP cyclohydrolase                                                |
| OG1RF_10565    | OG1RF_RS02965  | 233.4195  | 82.5180   | 66.6178   | 1033.9677  | 364.1107   | 662.1098   | 2.4125  | 8.6951  | 0.0000  | 0.0018 | PTS cellbiose transporter subunit IIC                             |
| OG1RF_10567    | OG1RF_RS02975  | 132.6247  | 30.0066   | 26.6471   | 441.3277   | 144.9197   | 277.2585   | 2.1551  | 7.5121  | 0.0004  | 0.0184 | hypothetical protein (outer surface protein)                      |
| OG1RF_10585    | OG1RF_RS03065  | 34.4824   | 22.5049   | 9.9927    | 85.7437    | 52.5334    | 84.8328    | 1.6825  | 5.7758  | 0.0011  | 0.0342 | hypothetical protein (M protein trans-acting positive regulator)  |
| OG1RF_10627    | OG1RF_RS03265  | 2503.9542 | 3803.3312 | 5176.2016 | 10014.3554 | 12850.7521 | 8520.5260  | 1.4507  | 12.8041 | 0.0006  | 0.0248 | bifunctional acetaldehyde-CoA/alcohol dehydrogenase               |
| OG1RF_10838    | OG1RF_RS04395  | 387.2641  | 457.6000  | 419.6920  | 12.6094    | 19.9265    | 8.2764     | -4.8996 | 7.7734  | 0.0000  | 0.0000 | manganese transporter                                             |
| OG1RF_10839    | OG1RF_RS04400  | 82.2273   | 86.2689   | 93.2649   | 2.5219     | 0.0000     | 6.2073     | -4.8069 | 5.5680  | 0.0000  | 0.0000 | universal stress protein UspA                                     |
| OG1RF_10849    | OG1RF_RS04450  | 320.9518  | 150.0328  | 266.4711  | 1094.4926  | 561.5637   | 678.6626   | 1.6552  | 9.0194  | 0.0002  | 0.0120 | galactokinase                                                     |
| OG1RF_10851    | OG1RF_RS04460  | 400.5266  | 315.0689  | 269.8020  | 1205.4550  | 570.6212   | 993.1648   | 1.4870  | 9.3048  | 0.0006  | 0.0221 | galactose-1-phosphate uridylyltransferase                         |
| OG1RF_10859    | OG1RF_RS04500  | 289.1218  | 123.7770  | 176.5371  | 991.0959   | 445.6280   | 639.3498   | 1.8061  | 8.8178  | 0.0001  | 0.0077 | excinuclease ABC subunit A (Y family DNA-directed DNA polymerase) |
| OG1RF_10860    | OG1RF_RS04505  | 55.7024   | 26.2557   | 53.2942   | 216.8810   | 101.4438   | 167.5966   | 1.8143  | 6.7839  | 0.0001  | 0.0078 | hypothetical protein                                              |

|             |               |            |           |           |           |           |           |         |         |        |        |                                                                                                             |
|-------------|---------------|------------|-----------|-----------|-----------|-----------|-----------|---------|---------|--------|--------|-------------------------------------------------------------------------------------------------------------|
| OG1RF_10861 | OG1RF_RS04510 | 34.4824    | 15.0033   | 36.6398   | 98.3530   | 72.4598   | 111.7310  | 1.6747  | 6.0889  | 0.0004 | 0.0182 | hypothetical protein                                                                                        |
| OG1RF_10862 | OG1RF_RS04515 | 119.3622   | 75.0164   | 99.9267   | 257.2310  | 231.8715  | 285.5349  | 1.3836  | 7.5312  | 0.0006 | 0.0248 | hypothetical protein                                                                                        |
| OG1RF_10870 | OG1RF_RS04555 | 132.6247   | 157.5344  | 136.5665  | 360.6278  | 507.2189  | 502.7897  | 1.6850  | 8.2613  | 0.0000 | 0.0027 | cell wall surface anchor protein (ebpA)                                                                     |
| OG1RF_10871 | OG1RF_RS04560 | 161.8021   | 311.3180  | 236.4931  | 491.7651  | 833.2881  | 755.2190  | 1.5567  | 8.8831  | 0.0003 | 0.0149 | cell wall surface anchor protein (ebpB)                                                                     |
| OG1RF_10874 | OG1RF_RS04575 | 42.4399    | 71.2656   | 86.6031   | 7.5656    | 19.9265   | 18.6218   | -2.0480 | 5.4664  | 0.0001 | 0.0061 | DUF378 domain-containing protein                                                                            |
| OG1RF_10910 | OG1RF_RS04755 | 58.3549    | 176.2885  | 266.4711  | 17.6531   | 47.0989   | 2.0691    | -2.8636 | 6.5904  | 0.0001 | 0.0052 | CBS domain-containing protein                                                                               |
| OG1RF_10911 | OG1RF_RS04760 | 84.8798    | 183.7902  | 229.8313  | 22.6969   | 41.6644   | 24.8291   | -2.4465 | 6.6443  | 0.0000 | 0.0002 | 2,3,4,5-tetrahydropyridine-2,6-dicarboxylate N-acetyltransferase                                            |
| OG1RF_10912 | OG1RF_RS04765 | 92.8373    | 93.7705   | 119.9120  | 17.6531   | 39.8529   | 24.8291   | -1.8562 | 6.0907  | 0.0001 | 0.0041 | acetyl diaminopimelate deacetylase                                                                          |
| OG1RF_10993 | OG1RF_RS05165 | 7.9575     | 30.0066   | 46.6324   | 2.5219    | 1.8115    | 2.0691    | -3.5309 | 4.2002  | 0.0001 | 0.0075 | spermidine/putrescine ABC transporter substrate-binding protein                                             |
| OG1RF_10995 | OG1RF_RS05175 | 23.8724    | 22.5049   | 29.9780   | 5.0437    | 3.6230    | 4.1382    | -2.5126 | 4.2291  | 0.0002 | 0.0082 | amidohydrolase                                                                                              |
| OG1RF_11012 | OG1RF_RS05265 | 5.3050     | 3.7508    | 3.3309    | 20.1750   | 23.5494   | 24.8291   | 2.3575  | 4.2929  | 0.0018 | 0.0475 | DUF5067 domain-containing protein                                                                           |
| OG1RF_11036 | OG1RF_RS05385 | 1562.3189  | 978.9639  | 769.4354  | 363.1496  | 461.9315  | 333.1240  | -1.5149 | 9.5479  | 0.0004 | 0.0164 | ATPase P (E1-E2 family cation-transporting ATPase)                                                          |
| OG1RF_11050 | OG1RF_RS05450 | 87.5323    | 191.2918  | 173.2062  | 42.8718   | 67.0253   | 55.8655   | -1.4239 | 6.7270  | 0.0018 | 0.0475 | DNA replication protein Dnal                                                                                |
| OG1RF_11058 | OG1RF_RS05490 | 1501.3115  | 3158.1902 | 2081.8057 | 423.6746  | 742.7133  | 643.4880  | -1.8948 | 10.4789 | 0.0000 | 0.0019 | hypothetical protein                                                                                        |
| OG1RF_11059 | OG1RF_RS05495 | 273.2069   | 675.1475  | 516.2878  | 95.8312   | 141.2967  | 142.7674  | -1.9372 | 8.2731  | 0.0000 | 0.0020 | tail protein                                                                                                |
| OG1RF_11060 | OG1RF_RS05500 | 713.5208   | 1462.8197 | 959.2961  | 216.8810  | 355.0532  | 347.6077  | -1.7653 | 9.4052  | 0.0001 | 0.0041 | structural protein                                                                                          |
| OG1RF_11061 | OG1RF_RS05505 | 1042.4301  | 2085.4557 | 1488.9074 | 421.1527  | 514.4648  | 562.7934  | -1.6212 | 9.9964  | 0.0001 | 0.0065 | hypothetical protein                                                                                        |
| OG1RF_11062 | OG1RF_RS05510 | 363.3917   | 510.1115  | 393.0449  | 148.7905  | 126.8047  | 215.1857  | -1.3647 | 8.2088  | 0.0009 | 0.0315 | holin                                                                                                       |
| OG1RF_11063 | OG1RF_RS05515 | 572.9387   | 1211.5148 | 1009.2594 | 199.2279  | 251.7979  | 252.4294  | -1.9852 | 9.1916  | 0.0000 | 0.0006 | N-acetylmuramoyl-L-alanine amidase                                                                          |
| OG1RF_11167 | OG1RF_RS06055 | 106.0998   | 82.5180   | 99.9267   | 274.8841  | 201.0760  | 244.1530  | 1.3095  | 7.4482  | 0.0012 | 0.0362 | alanine--tRNA ligase                                                                                        |
| OG1RF_11246 | OG1RF_RS06450 | 18647.0316 | 2726.8459 | 3350.8744 | 2047.7604 | 1758.9626 | 2296.6935 | -2.0184 | 12.3283 | 0.0014 | 0.0406 | type I glyceraldehyde-3-phosphate dehydrogenase                                                             |
| OG1RF_11269 | OG1RF_RS06565 | 1973.4554  | 4403.4623 | 7431.2136 | 1412.2486 | 1068.7826 | 1154.5540 | -1.9250 | 11.5063 | 0.0001 | 0.0060 | transcriptional regulator (DNA-binding protein HU)                                                          |
| OG1RF_11379 | OG1RF_RS07115 | 1729.4260  | 1331.5410 | 1462.2603 | 615.3369  | 579.6787  | 655.9026  | -1.2893 | 10.0579 | 0.0008 | 0.0274 | oxidoreductase                                                                                              |
| OG1RF_11400 | OG1RF_RS07215 | 156.4971   | 101.2721  | 113.2502  | 469.0683  | 210.1335  | 343.4695  | 1.4507  | 7.8997  | 0.0011 | 0.0343 | adenine phosphoribosyltransferase                                                                           |
| OG1RF_11437 | OG1RF_RS07400 | 156.4971   | 273.8098  | 406.3685  | 98.3530   | 105.0668  | 88.9710   | -1.5094 | 7.5769  | 0.0008 | 0.0279 | cold-shock protein                                                                                          |
| OG1RF_11489 | OG1RF_RS07650 | 2697.5862  | 1155.2525 | 1785.3566 | 52.9593   | 32.6069   | 35.1746   | -5.5472 | 9.9098  | 0.0000 | 0.0000 | phosphoribosylamine--glycine ligase                                                                         |
| OG1RF_11490 | OG1RF_RS07655 | 1917.7530  | 933.9541  | 909.3327  | 47.9156   | 23.5494   | 55.8655   | -4.8856 | 9.3450  | 0.0000 | 0.0000 | bifunctional phosphoribosylaminoimidazolecarboxamide formyltransferase/inosine monophosphate cyclohydrolase |
| OG1RF_11491 | OG1RF_RS07660 | 400.5266   | 157.5344  | 173.2062  | 20.1750   | 1.8115    | 10.3455   | -4.5388 | 7.0238  | 0.0000 | 0.0000 | phosphoribosylglycinamide formyltransferase                                                                 |

|             |               |          |           |           |           |           |           |         |        |        |        |                                                                       |
|-------------|---------------|----------|-----------|-----------|-----------|-----------|-----------|---------|--------|--------|--------|-----------------------------------------------------------------------|
| OG1RF_11492 | OG1RF_RS07665 | 270.5544 | 168.7869  | 179.8680  | 10.0875   | 5.4345    | 4.1382    | -4.9605 | 6.7653 | 0.0000 | 0.0000 | phosphoribosylformylglycinamide cyclo-ligase                          |
| OG1RF_11493 | OG1RF_RS07670 | 374.0016 | 206.2951  | 256.4785  | 25.2187   | 10.8690   | 12.4146   | -4.1262 | 7.2284 | 0.0000 | 0.0000 | amidophosphoribosyltransferase                                        |
| OG1RF_11494 | OG1RF_RS07675 | 631.2935 | 266.3082  | 266.4711  | 7.5656    | 19.9265   | 22.7600   | -4.4845 | 7.6805 | 0.0000 | 0.0000 | phosphoribosylformylglycinamide synthase II                           |
| OG1RF_11495 | OG1RF_RS07680 | 196.2845 | 78.7672   | 99.9267   | 12.6094   | 3.6230    | 14.4837   | -3.6189 | 6.1465 | 0.0000 | 0.0000 | phosphoribosylformylglycinamide synthase subunit PurQ                 |
| OG1RF_11496 | OG1RF_RS07685 | 18.5675  | 22.5049   | 19.9853   | 0.0000    | 0.0000    | 0.0000    | -6.0205 | 3.7993 | 0.0000 | 0.0003 | phosphoribosylformylglycinamide synthase                              |
| OG1RF_11497 | OG1RF_RS07690 | 76.9223  | 18.7541   | 3.3309    | 7.5656    | 0.0000    | 2.0691    | -3.3788 | 4.4932 | 0.0015 | 0.0432 | phosphoribosylaminoimidazolesuccinocarboxamide synthase               |
| OG1RF_11498 | OG1RF_RS07695 | 127.3197 | 37.5082   | 33.3089   | 27.7406   | 5.4345    | 6.2073    | -2.3806 | 5.4484 | 0.0015 | 0.0424 | 5-(carboxyamino)imidazole ribonucleotide synthase                     |
| OG1RF_11506 | OG1RF_RS07735 | 209.5470 | 311.3180  | 469.6554  | 88.2655   | 157.6001  | 111.7310  | -1.4594 | 7.8308 | 0.0012 | 0.0358 | hypothetical protein (putative lipoprotein)                           |
| OG1RF_11519 | OG1RF_RS07800 | 34.4824  | 93.7705   | 66.6178   | 10.0875   | 18.1150   | 4.1382    | -2.5097 | 5.3395 | 0.0000 | 0.0031 | universal stress protein A                                            |
| OG1RF_11564 | OG1RF_RS08025 | 259.9444 | 367.5803  | 906.0018  | 100.8749  | 110.5013  | 82.7637   | -2.3767 | 8.2599 | 0.0000 | 0.0005 | 50S ribosomal protein L19                                             |
| OG1RF_11576 | OG1RF_RS08085 | 37.1349  | 48.7607   | 109.9193  | 22.6969   | 14.4920   | 18.6218   | -1.8012 | 5.4978 | 0.0016 | 0.0434 | membrane protein                                                      |
| OG1RF_11584 | OG1RF_RS08125 | 31.8299  | 56.2623   | 66.6178   | 174.0092  | 146.7312  | 167.5966  | 1.6689  | 6.8297 | 0.0002 | 0.0096 | C4-dicarboxylate ABC transporter (C4-dicarboxylate anaerobic carrier) |
| OG1RF_11677 | OG1RF_RS08600 | 135.2772 | 150.0328  | 139.8973  | 7.5656    | 12.6805   | 6.2073    | -3.9282 | 6.2738 | 0.0000 | 0.0000 | ABC transporter ATP-binding protein                                   |
| OG1RF_11678 | OG1RF_RS08605 | 108.7522 | 93.7705   | 66.6178   | 7.5656    | 28.9839   | 8.2764    | -2.5118 | 5.7973 | 0.0000 | 0.0004 | membrane protein                                                      |
| OG1RF_11679 | OG1RF_RS08610 | 907.1529 | 2096.7082 | 2891.2117 | 27.7406   | 27.1724   | 16.5527   | -6.3493 | 9.9577 | 0.0000 | 0.0000 | manganese ABC transporter substrate-binding protein                   |
| OG1RF_11749 | OG1RF_RS08955 | 973.4652 | 1204.0131 | 1825.3272 | 602.7275  | 489.1039  | 546.2406  | -1.2886 | 9.8813 | 0.0016 | 0.0442 | hypothetical protein                                                  |
| OG1RF_11752 | OG1RF_RS08970 | 42.4399  | 11.2525   | 19.9853   | 131.1374  | 56.1564   | 74.4874   | 1.7552  | 5.9621 | 0.0011 | 0.0342 | hypothetical protein                                                  |
| OG1RF_11753 | OG1RF_RS08975 | 458.8814 | 603.8820  | 649.5234  | 1621.5640 | 1345.9415 | 1309.7360 | 1.3213  | 9.9727 | 0.0007 | 0.0268 | PTS maltose transporter subunit IIBC                                  |
| OG1RF_11774 | OG1RF_RS09080 | 63.6599  | 45.0098   | 83.2722   | 292.5372  | 271.7244  | 256.5676  | 2.0848  | 7.4603 | 0.0000 | 0.0002 | sugar ABC transporter substrate-binding protein                       |
| OG1RF_11775 | OG1RF_RS09085 | 74.2698  | 41.2590   | 96.5958   | 378.2809  | 239.1175  | 246.2221  | 2.0099  | 7.5416 | 0.0000 | 0.0014 | glucuronyl hydrolase                                                  |
| OG1RF_11776 | OG1RF_RS09090 | 236.0720 | 367.5803  | 546.2658  | 1518.1672 | 1068.7826 | 1222.8341 | 1.7293  | 9.7030 | 0.0001 | 0.0050 | hypothetical protein                                                  |
| OG1RF_11778 | OG1RF_RS09100 | 400.5266 | 247.5541  | 326.4271  | 781.7805  | 661.1960  | 989.0266  | 1.3152  | 9.1666 | 0.0012 | 0.0367 | LacI family transcriptional regulator                                 |
| OG1RF_11794 | OG1RF_RS09180 | 119.3622 | 26.2557   | 43.3016   | 264.7966  | 210.1335  | 184.1493  | 1.7648  | 7.2150 | 0.0005 | 0.0212 | hypothetical protein                                                  |
| OG1RF_11860 | OG1RF_RS09520 | 193.6320 | 135.0295  | 229.8313  | 22.6969   | 32.6069   | 28.9673   | -2.7058 | 6.7797 | 0.0000 | 0.0000 | guanosine monophosphate reductase                                     |
| OG1RF_11976 | OG1RF_RS10110 | 599.4636 | 303.8164  | 373.0596  | 2080.5448 | 746.3363  | 1390.4307 | 1.7199  | 9.8493 | 0.0003 | 0.0140 | PTS beta-glucoside transporter subunit EIIBCA                         |
| OG1RF_12046 | OG1RF_RS10465 | 448.2715 | 933.9541  | 1515.5545 | 146.2686  | 447.4395  | 258.6367  | -1.7602 | 9.2931 | 0.0009 | 0.0315 | adapter protein MecA                                                  |
| OG1RF_12070 | OG1RF_RS10590 | 39.7874  | 82.5180   | 196.5225  | 25.2187   | 38.0414   | 18.6218   | -1.9329 | 6.1199 | 0.0012 | 0.0373 | hypothetical protein                                                  |
| OG1RF_12078 | OG1RF_RS10630 | 18.5675  | 26.2557   | 29.9780   | 78.1780   | 65.2139   | 72.4183   | 1.5324  | 5.7721 | 0.0011 | 0.0342 | AraC family transcriptional regulator                                 |
| OG1RF_12143 | OG1RF_RS10965 | 68.9648  | 157.5344  | 149.8900  | 55.4812   | 27.1724   | 37.2437   | -1.6493 | 6.4149 | 0.0007 | 0.0265 | DUF3042 domain-containing protein                                     |

|             |               |          |          |          |           |          |           |         |        |        |        |                                 |
|-------------|---------------|----------|----------|----------|-----------|----------|-----------|---------|--------|--------|--------|---------------------------------|
| OG1RF_12243 | OG1RF_RS11490 | 124.6672 | 161.2852 | 129.9047 | 388.3684  | 260.8554 | 492.4442  | 1.4575  | 8.0563 | 0.0005 | 0.0217 | D-ribose pyranase               |
| OG1RF_12244 | OG1RF_RS11495 | 302.3843 | 397.5869 | 356.4051 | 859.9585  | 722.7869 | 1051.0994 | 1.3189  | 9.2800 | 0.0009 | 0.0315 | ribokinase                      |
| OG1RF_12280 | OG1RF_RS11675 | 10.6100  | 15.0033  | 9.9927   | 100.8749  | 47.0989  | 57.9346   | 2.5045  | 5.5431 | 0.0000 | 0.0020 | allantoin permease              |
| OG1RF_12310 | OG1RF_RS11830 | 95.4898  | 75.0164  | 99.9267  | 10.0875   | 52.5334  | 16.5527   | -1.7225 | 5.9557 | 0.0013 | 0.0397 | peptidase                       |
| OG1RF_12328 | OG1RF_RS11925 | 50.3974  | 153.7836 | 303.1109 | 20.1750   | 50.7219  | 26.8982   | -2.3421 | 6.6853 | 0.0001 | 0.0080 | hypothetical protein            |
| OG1RF_12393 | OG1RF_RS12260 | 164.4546 | 183.7902 | 343.0816 | 73.1343   | 67.0253  | 47.5891   | -1.8762 | 7.2214 | 0.0000 | 0.0031 | hypothetical protein            |
| OG1RF_12425 | OG1RF_RS12410 | 503.9738 | 341.3246 | 346.4125 | 1684.6108 | 912.9939 | 1247.6632 | 1.6862  | 9.7253 | 0.0001 | 0.0044 | glycosyl hydrolase              |
| OG1RF_12461 | OG1RF_RS12570 | 47.7449  | 45.0098  | 46.6324  | 110.9624  | 481.8579 | 157.2511  | 2.4236  | 7.2917 | 0.0000 | 0.0023 | murein hydrolase regulator LrgA |

7  
8  
9  
0  
1  
2  
3  
4  
5  
6  
7  
8  
9



1170 Supplementary Table 2. Strains used in this study.

|                                                                    | Strain name                                         | Relevant characteristics                                                                                                                                                                                                                                                                                                                                    | Plasmid Source                                                                               | Plasmid made                | References |
|--------------------------------------------------------------------|-----------------------------------------------------|-------------------------------------------------------------------------------------------------------------------------------------------------------------------------------------------------------------------------------------------------------------------------------------------------------------------------------------------------------------|----------------------------------------------------------------------------------------------|-----------------------------|------------|
| <b><i>E. faecalis</i> laboratory strain</b>                        | <i>E. faecalis</i> OG1RF wild type                  | Laboratory strain, Rif <sup>R</sup> , Fus <sup>R</sup>                                                                                                                                                                                                                                                                                                      | -                                                                                            | -                           | 1          |
| <b><i>E. faecalis</i> markerless, in-frame chromosomal mutants</b> | OG1RF <i>ΔebpABC</i>                                | <i>ebpABC</i> triple deletion mutant; Rif <sup>R</sup> , Fus <sup>R</sup>                                                                                                                                                                                                                                                                                   | -                                                                                            | -                           | 2,3        |
|                                                                    | OG1RF <i>ΔebpA</i>                                  | <i>ebpA</i> single deletion mutant; Rif <sup>R</sup> , Fus <sup>R</sup>                                                                                                                                                                                                                                                                                     | -                                                                                            | -                           | 2,3        |
|                                                                    | OG1RF <i>ΔebpB</i>                                  | <i>ebpB</i> single deletion mutant; Rif <sup>R</sup> , Fus <sup>R</sup>                                                                                                                                                                                                                                                                                     | -                                                                                            | -                           | 2,3        |
|                                                                    | OG1RF <i>ΔebpC</i>                                  | <i>ebpC</i> single deletion mutant; Rif <sup>R</sup> , Fus <sup>R</sup>                                                                                                                                                                                                                                                                                     | -                                                                                            | -                           | 2,3        |
|                                                                    | OG1RF <i>ndh3::Tn ΔmenB</i>                         | <i>menB</i> in-frame deletion with insertional mutation of <i>ndh3</i>                                                                                                                                                                                                                                                                                      | pGCP213                                                                                      | pGCP213:: <i>delta_menB</i> | This study |
| <b><i>E. faecalis</i> chromosomal pilin mutant</b>                 | OG1RF <i>ebpA</i> <sup>AWAGA</sup> (MIDAS)          | <i>ebpA</i> allelic replacement with <i>ebpA</i> <sup>AWAGA</sup> (coding for Ala <sup>315</sup> -Trp-Ala <sup>317</sup> -Gly-Ala <sup>319</sup> ); Rif <sup>R</sup> , Fus <sup>R</sup>                                                                                                                                                                     | -                                                                                            | -                           | 2,3        |
| <b><i>E. faecalis</i> transposon mutants</b>                       | OG1RF <i>menB::Tn</i>                               | Rif <sup>R</sup> , Fus <sup>R</sup> , Cm <sup>R</sup><br>(Insertional position 5' – 3': 343473)                                                                                                                                                                                                                                                             | -                                                                                            | -                           | 4,5        |
|                                                                    | OG1RF <i>ndh3::Tn</i>                               | Rif <sup>R</sup> , Fus <sup>R</sup> , Cm <sup>R</sup><br>(Insertion position 5' – 3': 2658965)                                                                                                                                                                                                                                                              | -                                                                                            | -                           | 4,5        |
|                                                                    | OG1RF <i>ldh1::Tn</i>                               | Rif <sup>R</sup> , Fus <sup>R</sup> , Cm <sup>R</sup><br>(Insertion position 5' – 3': 197152)                                                                                                                                                                                                                                                               | -                                                                                            | -                           | 4-6        |
|                                                                    | OG1RF_RS12785-12815::Tn                             | Rif <sup>R</sup> , Fus <sup>R</sup> , Cm <sup>R</sup><br>(RS12785 Insertion position 5' – 3': 2654550)<br>(RS12795 Insertion position 5' – 3': 2657169)<br>(RS12800 Insertion position 5' – 3': 2658965)<br>(RS12805 Insertion position 5' – 3': 2660151)<br>(RS12810 Insertion position 5' – 3': 2660397)<br>(RS12815 Insertion position 5' – 3': 2660975) | -                                                                                            | -                           | 4,5        |
|                                                                    | OG1RF_RS01800-01825::Tn                             | Rif <sup>R</sup> , Fus <sup>R</sup> , Cm <sup>R</sup><br>(RS01800 Insertion position 5' – 3': 343437)<br>(RS01805 Insertion position 5' – 3': 343749)<br>(RS01820 Insertion position 5' – 3': 348095)<br>(RS01825 Insertion position 5' – 3': 349226)                                                                                                       | -                                                                                            | -                           | 4,5        |
|                                                                    | <b><i>E. faecalis</i> strains with empty vector</b> | OG1RF <i>ΔebpABC</i>                                                                                                                                                                                                                                                                                                                                        | <i>ebpABC</i> triple deletion mutant; Rif <sup>R</sup> , Fus <sup>R</sup> , Kan <sup>R</sup> | pGCP123                     | -          |
| OG1RF wild type                                                    |                                                     | Laboratory strain, Rif <sup>R</sup> , Fus <sup>R</sup> , Kan <sup>R</sup>                                                                                                                                                                                                                                                                                   | pGCP123                                                                                      | -                           | This study |

|                                                             |                              |                                                                             |                           |                        |                |
|-------------------------------------------------------------|------------------------------|-----------------------------------------------------------------------------|---------------------------|------------------------|----------------|
|                                                             | OG1RF <i>menB</i> ::Tn       | Rif <sup>R</sup> , Fus <sup>R</sup> , Erm <sup>R</sup>                      | pMSP3535                  | -                      | This study     |
|                                                             | OG1RF <i>ndh3</i> ::Tn       | Rif <sup>R</sup> , Fus <sup>R</sup> , Erm <sup>R</sup>                      | pMSP3535                  | -                      | This study     |
|                                                             | OG1RF <i>ldh1</i> ::Tn       | Rif <sup>R</sup> , Fus <sup>R</sup> , Erm <sup>R</sup>                      | pMSP3535                  | -                      | <sup>6</sup>   |
| <b><i>E. faecalis</i> mutants with gene complementation</b> | OG1RF $\Delta$ <i>ebpABC</i> | Complement mutation; Rif <sup>R</sup> , Fus <sup>R</sup> , Kan <sup>R</sup> | <i>gcp123::ebpABCsrtC</i> |                        | <sup>2,3</sup> |
|                                                             | OG1RF <i>menB</i> ::Tn       | Complement mutation; Rif <sup>R</sup> , Fus <sup>R</sup> , Erm <sup>R</sup> | pMSP3535                  | pMSP3535:: <i>menB</i> | This study     |
|                                                             | OG1RF <i>ndh3</i> ::Tn       | Complement mutation; Rif <sup>R</sup> , Fus <sup>R</sup> , Erm <sup>R</sup> | pMSP3535                  | pMSP3535:: <i>ndh3</i> | This study     |
|                                                             | OG1RF <i>ldh1</i> ::Tn       | Complement mutation; Rif <sup>R</sup> , Fus <sup>R</sup> , Erm <sup>R</sup> | pMSP3535                  | pMSP3535:: <i>ldh1</i> | <sup>6</sup>   |

1171

1172

- 1173 1 Bourgogne, A. *et al.* Large scale variation in *Enterococcus faecalis* illustrated by the genome analysis of strain OG1RF. *Genome biology* **9**, R110,  
1174 doi:10.1186/gb-2008-9-7-r110 (2008).
- 1175 2 Nielsen, H. V. *et al.* Pilin and sortase residues critical for endocarditis- and biofilm-associated pilus biogenesis in *Enterococcus faecalis*. *Journal of*  
1176 *bacteriology* **195**, 4484-4495, doi:10.1128/jb.00451-13 (2013).
- 1177 3 Nielsen, H. V. *et al.* The metal ion-dependent adhesion site motif of the *Enterococcus faecalis* EbpA pilin mediates pilus function in catheter-associated  
1178 urinary tract infection. *mBio* **3**, e00177-00112, doi:10.1128/mBio.00177-12 (2012).
- 1179 4 Kristich, C. J. *et al.* Development and use of an efficient system for random mariner transposon mutagenesis to identify novel genetic determinants  
1180 of biofilm formation in the core *Enterococcus faecalis* genome. *Appl Environ Microbiol* **74**, 3377-3386, doi:10.1128/aem.02665-07 (2008).
- 1181 5 Dale, J. L. *et al.* Comprehensive Functional Analysis of the *Enterococcus faecalis* Core Genome Using an Ordered, Sequence-Defined Collection of  
1182 Insertional Mutations in Strain OG1RF. *mSystems* **3**, doi:10.1128/mSystems.00062-18 (2018).
- 1183 6 Keogh, D. *et al.* Extracellular Electron Transfer Powers *Enterococcus faecalis* Biofilm Metabolism. *mBio* **9**, doi:10.1128/mBio.00626-17 (2018).

1184

1185

1186

1187

1188

1189

1190 **Supplementary Table 3. Primers used in this study.**

|                                                             | <b>Primer name</b> | <b>Primer sequence (5' → 3')</b>                       | <b>Restriction sites<sup>a</sup></b> | <b>References</b> |
|-------------------------------------------------------------|--------------------|--------------------------------------------------------|--------------------------------------|-------------------|
| <b>Primers used to generate complement plasmids</b>         | ndh3_F'            | <u>GGATCCA</u> AGGAGCGGATTGTCAA                        | BamHI                                | This study        |
|                                                             | ndh3_R'            | ACTAGT <u>GCTCGTAGTTGTCAAT</u> CGAT                    | SpeI                                 | This study        |
|                                                             | ndh3_F'_Infusion   | GACTCTGCAT <u>GGATCCGGATCCA</u> AGGAGCGGAT             | BamHI                                | This study        |
|                                                             | ndh3_R'_Infusion   | GCAGCCC <u>GGACTAGTACTAGT</u> GCTCGTAGTTGTCAA          | SpeI                                 | This study        |
|                                                             | menB_F'            | <u>GGATCCTTTCTCTAAAGT</u> GCCGAT                       | BamHI                                | This study        |
|                                                             | menB_R'            | ACTAGTTGTTTATTTA <u>ACCAAGTCATT</u> GG                 | SpeI                                 | This study        |
|                                                             | menB_F'_Infusion   | GACTCTGCAT <u>GGATCCGGATCCTTTCTCTAAAGT</u> GCC         | BamHI                                | This study        |
|                                                             | menB_R'_Infusion   | GCAGCCC <u>GGACTAGTACTAGTTGTTTATTTA</u> ACCAAGTCATT    | SpeI                                 | This study        |
| <b>Primers used to generate chromosomal deletion strain</b> | IFD_menB_Frag1_F'  | TCTCTAAA <u>ACCAATGACTTGGTTAAATA</u> AAC               | -                                    | This study        |
|                                                             | IFD_menB_Frag1_R'  | GGCGGCCGTT <u>ACTAGTCAAATGCGTATTTAAAA</u> ATAACTCTTTCC | SpeI                                 | This study        |
|                                                             | IFD_menB_Frag2_F'  | TACCGAGCT <u>CGGATCCAAGATGCCGTTTAA</u> GCCTC           | BamHI                                | This study        |
|                                                             | IFD_menB_Frag2_R'  | CATTGGTTTTAGAGAAAAAGTCGCTTGAATTTAAGA                   | -                                    | This study        |
| <b>Primers used in qRT-PCR</b>                              | gyrA_F'            | TGTTTCGTCGGGATGTGAGTG                                  |                                      | 1,2               |
|                                                             | gyrA_R'            | GGTACGCCTTTTTCGATGGC                                   |                                      | 1,2               |
|                                                             | ebpR_F'            | TAAACAGCGTTGGGGCGAAA                                   |                                      | 1                 |
|                                                             | ebpR_R'            | TGGGTGGTCGTTGACGTTTT                                   |                                      | 1                 |
|                                                             | ebpC_F'            | CGGTCATACCGACGACCAA                                    |                                      | 1                 |
|                                                             | ebpC_R'            | TGTCACATCGCCATCGACTT                                   |                                      | 1                 |
|                                                             | srtA_F'            | TCGTACGCCGTTAGCAAGTT                                   |                                      | This study        |
|                                                             | srtA_R'            | TTCATCACCGCTTCTGTGCT                                   |                                      | This study        |
|                                                             | srtC_F'            | ACACATGCGGTCATTTCAAGG                                  |                                      | This study        |
|                                                             | srtC_R'            | GCGTCTTCCCATTGACTTCG                                   |                                      | This study        |
|                                                             | argR3_F'           | CCACTATTTACAAGAAAAGGGCGT                               |                                      | This study        |
|                                                             | argR3_R'           | CGCGAGAAATCGTTGCTTGT                                   |                                      | This study        |

1191 <sup>a</sup> Restriction sites are underlined in the primer sequence.

1192

- 1193 1 Afonina, I., Lim, X. N., Tan, R. & Kline, K. A. Planktonic Interference and Biofilm Alliance between Aggregation Substance and Endocarditis- and Biofilm-  
1194 Associated Pili in *Enterococcus faecalis*. *Journal of bacteriology* **200**, doi:10.1128/jb.00361-18 (2018).
- 1195 2 Bourgogne, A. *et al.* EbpR is important for biofilm formation by activating expression of the endocarditis and biofilm-associated pilus operon (ebpABC)  
1196 of *Enterococcus faecalis* OG1RF. *Journal of bacteriology* **189**, 6490-6493, doi:10.1128/jb.00594-07 (2007).
- 1197
